# Supplementary material for: Neoansamycins from Streptomyces sp. LZ35
Source: Royal Society of Chemistry journal article supplement (doi:10.1039/c7ra06339c), 2017-01-01

Supporting information for

## Neoansamycins from *Streptomyces* sp. LZ35

Mengyujie Liu,<sup>a</sup> Chunhua Lu,<sup>a</sup> Ruocong Tang,<sup>b</sup> Shanren Li,<sup>a</sup> Haoxin Wang,<sup>b</sup> and Yuemao Shen<sup>\*,a,b</sup>

<sup>a</sup>*Key Laboratory of Chemical Biology (Ministry of Education), School of Pharmaceutical Sciences, Shandong University, No. 44 West Wenhua Road, Jinan, Shandong 250012, P. R. China.*

<sup>b</sup>*State Key Laboratory of Microbial Technology, Shandong University, Jinan, Shandong 250100, P. R. China*

\*Correspondence:

Yuemao Shen

Tel: +86-531-88382108, E-mail: [yshen@sdu.edu.cn](mailto:yshen@sdu.edu.cn)

## NMR data for compounds 1-6.

|                                                                                                              |    |
|--------------------------------------------------------------------------------------------------------------|----|
| <b>Table S1:</b> NMR spectroscopy data for neoansamycin D (in CD <sub>3</sub> OD).....                       | 3  |
| <b>Figure S1:</b> Selected <sup>1</sup> H- <sup>1</sup> H COSY and HMBC correlations for neoansamycin D..... | 4  |
| <b>Table S2:</b> NMR spectroscopy data for neoansamycin E (in CD <sub>3</sub> OD).....                       | 5  |
| <b>Figure S2:</b> Selected <sup>1</sup> H- <sup>1</sup> H COSY and HMBC correlations for neoansamycin E..... | 6  |
| <b>Table S3:</b> NMR spectroscopy data for neoansamycin F (in DMSO- <i>d</i> <sub>6</sub> ).....             | 7  |
| <b>Figure S3:</b> Selected <sup>1</sup> H- <sup>1</sup> H COSY and HMBC correlations for neoansamycin F..... | 8  |
| <b>Table S4:</b> NMR spectroscopy data for neoansamycin G (in CD <sub>3</sub> OD).....                       | 9  |
| <b>Figure S4:</b> Selected <sup>1</sup> H- <sup>1</sup> H COSY and HMBC correlations for neoansamycin G..... | 10 |
| <b>Table S5:</b> NMR spectroscopy data for neoansamycin H (in CD <sub>3</sub> OD).....                       | 11 |
| <b>Figure S5:</b> Selected <sup>1</sup> H- <sup>1</sup> H COSY and HMBC correlations for neoansamycin H..... | 12 |
| <b>Table S6:</b> NMR spectroscopy data for neoansamycin I (in DMSO- <i>d</i> <sub>6</sub> ).....             | 13 |
| <b>Figure S6:</b> Selected <sup>1</sup> H- <sup>1</sup> H COSY and HMBC correlations for neoansamycin I..... | 14 |
| <b>Spectroscopic data information for compounds 1–6.</b>                                                     |    |
| <b>Figure S7</b> <sup>1</sup> H NMR (600 MHz, CD <sub>3</sub> OD) spectrum for compound <b>1</b> .....       | 17 |
| <b>Figure S8</b> <sup>13</sup> C NMR (151 MHz, CD <sub>3</sub> OD) spectrum for compound <b>1</b> .....      | 17 |
| <b>Figure S9</b> The HSQC spectrum for compound <b>1</b> .....                                               | 18 |
| <b>Figure S10</b> The HMBC spectrum for compound <b>1</b> .....                                              | 18 |
| <b>Figure S11</b> <sup>1</sup> H- <sup>1</sup> H COSY spectrum for compound <b>1</b> .....                   | 19 |
| <b>Figure S12</b> The NOESY spectrum for compound <b>1</b> .....                                             | 19 |
| <b>Figure S13</b> The HRMS-ESI spectrum for compound <b>1</b> .....                                          | 20 |

|                                                                                                               |    |
|---------------------------------------------------------------------------------------------------------------|----|
| <b>Figure S14</b> $^1\text{H}$ NMR (600 MHz, $\text{CD}_3\text{OD}$ ) spectrum for compound <b>2</b> .....    | 20 |
| <b>Figure S15</b> $^{13}\text{C}$ NMR (151 MHz, $\text{CD}_3\text{OD}$ ) spectrum for compound <b>2</b> ..... | 21 |
| <b>Figure S16</b> The HSQC spectrum for compound <b>2</b> .....                                               | 21 |
| <b>Figure S17</b> The HMBC spectrum for compound <b>2</b> .....                                               | 22 |
| <b>Figure S18</b> $^1\text{H}$ - $^1\text{H}$ COSY spectrum for compound <b>2</b> .....                       | 22 |
| <b>Figure S19</b> The HRMS-ESI spectrum for compound <b>2</b> .....                                           | 23 |
| <b>Figure S20</b> $^1\text{H}$ NMR (600 MHz, $\text{DMSO-}d_6$ ) spectrum for compound <b>3</b> .....         | 23 |
| <b>Figure S21</b> $^{13}\text{C}$ NMR (151 MHz, $\text{DMSO-}d_6$ ) spectrum for compound <b>3</b> .....      | 24 |
| <b>Figure S22</b> The HSQC spectrum for compound <b>3</b> .....                                               | 24 |
| <b>Figure S23</b> The HMBC spectrum for compound <b>3</b> .....                                               | 25 |
| <b>Figure S24</b> $^1\text{H}$ - $^1\text{H}$ COSY spectrum for compound <b>3</b> .....                       | 25 |
| <b>Figure S25</b> The NOESY spectrum for compound <b>3</b> .....                                              | 26 |
| <b>Figure S26</b> The HRMS-ESI spectrum for compound <b>3</b> .....                                           | 26 |
| <b>Figure S27</b> $^1\text{H}$ NMR (600 MHz, $\text{CD}_3\text{OD}$ ) spectrum for compound <b>4</b> .....    | 27 |
| <b>Figure S28</b> $^{13}\text{C}$ NMR (151 MHz, $\text{CD}_3\text{OD}$ ) spectrum for compound <b>4</b> ..... | 27 |
| <b>Figure S29</b> The HSQC spectrum for compound <b>4</b> .....                                               | 28 |
| <b>Figure S30</b> The HMBC spectrum for compound <b>4</b> .....                                               | 28 |
| <b>Figure S31</b> $^1\text{H}$ - $^1\text{H}$ COSY spectrum for compound <b>4</b> .....                       | 29 |
| <b>Figure S32</b> The HRMS-ESI spectrum for compound <b>4</b> .....                                           | 29 |
| <b>Figure S33</b> $^1\text{H}$ NMR (600 MHz, $\text{CD}_3\text{OD}$ ) spectrum for compound <b>5</b> .....    | 30 |
| <b>Figure S34</b> $^{13}\text{C}$ NMR (151 MHz, $\text{CD}_3\text{OD}$ ) spectrum for compound <b>5</b> ..... | 30 |
| <b>Figure S35</b> The HSQC spectrum for compound <b>5</b> .....                                               | 31 |

|                                                                                                    |    |
|----------------------------------------------------------------------------------------------------|----|
| <b>Figure S36</b> The HMBC spectrum for compound <b>5</b> .....                                    | 31 |
| <b>Figure S37</b> $^1\text{H}$ - $^1\text{H}$ COSY spectrum for compound <b>5</b> .....            | 32 |
| <b>Figure S38</b> The NOESY spectrum for compound <b>5</b> .....                                   | 32 |
| <b>Figure S39</b> The HRMS-ESI spectrum for compound <b>5</b> .....                                | 33 |
| <b>Figure S40</b> $^1\text{H}$ NMR (600 MHz, DMSO- $d_6$ ) spectrum for compound <b>6</b> .....    | 33 |
| <b>Figure S41</b> $^{13}\text{C}$ NMR (151 MHz, DMSO- $d_6$ ) spectrum for compound <b>6</b> ..... | 34 |
| <b>Figure S42</b> The HSQC spectrum for compound <b>6</b> .....                                    | 34 |
| <b>Figure S43</b> The HMBC spectrum for compound <b>6</b> .....                                    | 35 |
| <b>Figure S44</b> $^1\text{H}$ - $^1\text{H}$ COSY spectrum for compound <b>6</b> .....            | 35 |
| <b>Figure S45</b> The HRMS-ESI spectrum for compound <b>6</b> .....                                | 36 |

**NMR data**

**Table S1:** NMR spectroscopy data for neoansamycin D (in CD<sub>3</sub>OD).

| Pos. | $\delta_C$ , type      | $\delta_H$ , Mult (J, Hz)       | <sup>1</sup> H- <sup>1</sup> H COSY | HMBC                                     | NOESY        |
|------|------------------------|---------------------------------|-------------------------------------|------------------------------------------|--------------|
| 1    | 194.2, C               |                                 |                                     |                                          |              |
| 2    | 70.0, C                |                                 |                                     |                                          |              |
| 3    | 49.9, CH <sub>2</sub>  | 2.46, d (9.4)<br>2.72, d (10.9) | H-19                                | C-1, C-2, C-4, C-5, C-18                 |              |
| 4    | 89.9, C                |                                 |                                     |                                          |              |
| 5    | 157.1, C               |                                 |                                     |                                          |              |
| 6    | 119.0, C               |                                 |                                     |                                          |              |
| 7    | 129.3, CH              | 7.75, d (8.4)                   | H-8                                 | C-1, C-4, C-5, C-6, C-9                  |              |
| 8    | 119.3, CH              | 6.96, d (8.4)                   | H-7                                 | C-6, C-9, C-11                           |              |
| 9    | 159.1 C                |                                 |                                     |                                          |              |
| 10   | 118.6, C               |                                 |                                     |                                          |              |
| 11   | 150.3, C               |                                 |                                     |                                          |              |
| 12   | 118.7, C               |                                 |                                     |                                          |              |
| 13   | 30.0, CH <sub>2</sub>  | 2.12, m<br>2.91, m              | H-14                                | C-11, C-12, C-14                         |              |
| 14   | 25.14, CH <sub>2</sub> | 1.68, m<br>1.98, m              | H-13, H-15                          |                                          |              |
| 15   | 32.4, CH <sub>2</sub>  | 1.43, m<br>2.04, m              | H-14, H-16                          |                                          |              |
| 16   | 88.7, CH               | 5.02, d (6.0)                   | H-15                                | C-14, C-15, C-16a                        |              |
| 17   | 215.9, C               |                                 |                                     |                                          |              |
| 18   | 61.9, C                |                                 |                                     |                                          |              |
| 19   | 60.6, CH               | 2.25, d (9.8)                   | H-20                                | C-1, C-2, C-3, C-4, C-18,<br>C-20, C-20a | H-18a, H-20a |
| 20   | 46.8, CH               | 2.66, m                         | H-19, H-20a                         | C-20a, C-20b, C-21                       |              |
| 21   | 180.4, C               |                                 |                                     |                                          |              |
| 12a  | 25.08, CH <sub>2</sub> | 2.49, m<br>2.86, m              | H-12b                               | C-11, C-12, C-12b, C-13                  |              |
| 12b  | 15.3, CH <sub>3</sub>  | 1.12, t (7.3)                   | H-12a                               | C-12, C-12a                              |              |
| 16a  | 58.8, CH <sub>3</sub>  | 3.37, s                         |                                     | C-16                                     |              |
| 18a  | 31.2, CH <sub>3</sub>  | 1.08, s                         |                                     | C-4, C-18                                | H-19         |
| 20a  | 31.8, CH <sub>2</sub>  | 1.91, m                         | H-20, H-20b                         | C-20b, C-20c                             |              |
| 20b  | 27.2, CH <sub>2</sub>  | 1.55, m                         | H-20a, H-20c                        |                                          |              |
| 20c  | 30.7, CH <sub>2</sub>  | 1.32, m                         |                                     | C-20e                                    |              |
| 20d  | 23.7, CH <sub>2</sub>  | 1.29, m                         |                                     | C-20c                                    |              |
| 20e  | 32.9, CH <sub>2</sub>  | 1.33, m                         | H-20f                               | C-20f                                    |              |
| 20f  | 14.4, CH <sub>3</sub>  | 0.91, t (6.7)                   | H-20e                               | C-20d, C-20e                             |              |

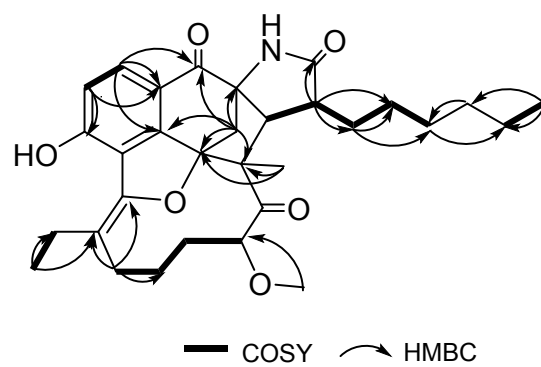

**Fig S1:** Selected  $^1\text{H}$ - $^1\text{H}$  COSY and HMBC correlations for neoansamycin D.

**Table S2:** NMR spectroscopy data for neoansmycin E (in CD<sub>3</sub>OD).

| Pos. | $\delta_C$ , type     | $\delta_H$ , Mult (J, Hz)       | <sup>1</sup> H- <sup>1</sup> H COSY | HMBC                                    |
|------|-----------------------|---------------------------------|-------------------------------------|-----------------------------------------|
| 1    | 195.3, C              |                                 |                                     |                                         |
| 2    | 70.1, C               |                                 |                                     |                                         |
| 3    | 51.3, CH <sub>2</sub> | 2.29, d (9.6)<br>3.05, d (10.8) |                                     | C-1, C-2, C-4, C-5, C-18                |
| 4    | 95.2, C               |                                 |                                     |                                         |
| 5    | 156.9, C              |                                 |                                     |                                         |
| 6    | 119.2, C              |                                 |                                     |                                         |
| 7    | 131.8, CH             | 7.86, d (8.4)                   | H-8                                 | C-1, C-4, C-5, C-6, C-9, C-10           |
| 8    | 119.0, CH             | 6.96, d (8.4)                   | H-7                                 | C-6, C-10                               |
| 9    | 161.4, C              |                                 |                                     |                                         |
| 10   | 121.6, C              |                                 |                                     |                                         |
| 11   | 209.5, C              |                                 |                                     |                                         |
| 12   | 49.6, CH              | 2.21, t (6.9)                   | H-12a, H-13                         | C-10, C-11, C-12a, C-12b                |
| 13   | 29.8, CH <sub>2</sub> | 2.01, m                         | H-12, H-14                          | C-12                                    |
| 14   | 26.0, CH <sub>2</sub> | 1.62, m                         | H-13                                |                                         |
| 15   | 30.0, CH <sub>2</sub> | 1.95, m                         | H-16                                | C-16                                    |
| 16   | 92.5, CH              | 4.26, br s                      | H-15                                |                                         |
| 17   | 214.2, C              |                                 |                                     |                                         |
| 18   | 60.1, C               |                                 |                                     |                                         |
| 19   | 61.2, CH              | 2.27, d (8.4)                   | H-20                                | C-1, C-2, C-3, C-18, C-18a, C-20, C-20a |
| 20   | 45.6, CH              | 2.75, m                         | H-19, H-20a                         | C-18, C-20b, C-21                       |
| 21   | 180.7, C              |                                 |                                     |                                         |
| 12a  | 24.6, CH <sub>2</sub> | 2.52, m                         | H-12, H-12b                         | C-10, C-12, C-12b, C-13                 |
| 12b  | 13.2, CH <sub>3</sub> | 0.93, t (7.8)                   | H-12a                               | C-12, C-12a                             |
| 16a  | 58.4, CH <sub>3</sub> | 3.37, s                         |                                     | C-16                                    |
| 18a  | 25.4, CH <sub>3</sub> | 1.41, s                         |                                     | C-4, C-17, C-19                         |
| 20a  | 31.5, CH <sub>2</sub> | 1.70, m                         | H-20, H-20b                         | C-20b, C-21                             |
| 20b  | 26.8, CH <sub>2</sub> | 1.27, m                         | H-20a                               | C-20d                                   |
| 20c  | 23.5, CH <sub>2</sub> | 1.45, m                         | H-20b                               |                                         |
| 20d  | 33.3, CH <sub>2</sub> | 1.29, m                         |                                     | C-20b                                   |
| 20e  | 23.6, CH <sub>2</sub> | 1.30, m                         | H-20f                               | C-20f                                   |
| 20f  | 14.4, CH <sub>3</sub> | 0.91, t (6.0)                   | H-20e                               | C-20d, C-20e                            |

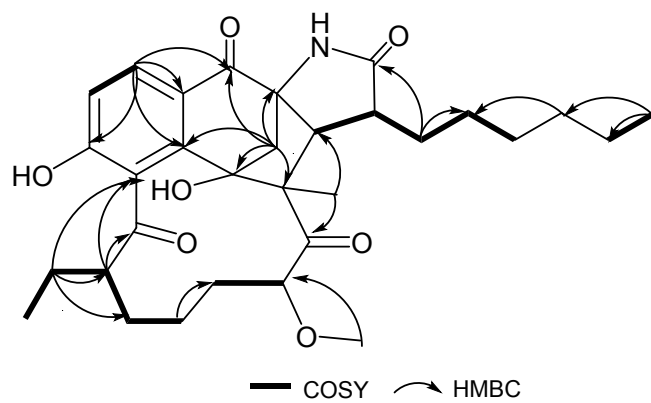

**Fig S2:** Selected  $^1\text{H}$ - $^1\text{H}$  COSY and HMBC correlations for neoansamycin E.



**Table S3:** NMR spectroscopy data for neoansamycin F (in DMSO-*d*<sub>6</sub>).

| Pos. | $\delta_c$ , type     | $\delta_H$ , Mult (J, Hz) | <sup>1</sup> H- <sup>1</sup> H COSY | HMBC              | NOESY       |
|------|-----------------------|---------------------------|-------------------------------------|-------------------|-------------|
| 1    | 190.3, C              |                           |                                     |                   |             |
| 2    | 73.9, C               |                           |                                     |                   |             |
| 3    | 91.2, C               |                           |                                     |                   |             |
| 4    | 94.9, C               |                           |                                     |                   |             |
| 5    | 153.0, C              |                           |                                     |                   |             |
| 6    | 116.3, C              |                           |                                     |                   |             |
| 7    | 128.2, CH             | 7.64, d (8.4)             | H-8                                 | C-5, C-9          |             |
| 8    | 109.0, CH             | 7.01, d (8.2)             | H-7                                 | C-10              |             |
| 9    | 158.7, C              |                           |                                     |                   |             |
| 10   | 117.9, C              |                           |                                     |                   |             |
| 11   | 149.5, C              |                           |                                     |                   |             |
| 12   | 115.7, C              |                           |                                     |                   |             |
| 13   | 28.4, CH <sub>2</sub> | 2.00, m<br>2.80, m        | H-14                                | C-11, C-12, C-15  |             |
| 14   | 24.5, CH <sub>2</sub> | 1.59, m<br>1.80, m        | H-13                                |                   |             |
| 15   | 30.4, CH <sub>2</sub> | 1.19, m<br>1.93, t (13.9) | H-16                                |                   |             |
| 16   | 85.4, CH              | 4.81, d (8.0)             | H-15                                | C-14, C-15, C-16a |             |
| 17   | 211.1, C              |                           |                                     |                   |             |
| 18   | 57.7, C               |                           |                                     |                   |             |
| 19   | 56.5, CH              | 2.04, d (9.6)             | H-20                                |                   | H-18a       |
| 20   | 44.6, CH              | 2.64, m                   | H-19, H-20a                         |                   |             |
| 21   | 178.7, C              |                           |                                     |                   |             |
| 12a  | 23.3, CH <sub>2</sub> | 2.48, m<br>2.75, m        | H-12b                               | C-11, C-12, C-12b |             |
| 12b  | 14.9, CH <sub>3</sub> | 1.06, t (7.3)             | H-12a                               | C-12, C-12a       |             |
| 16a  | 56.7, CH <sub>3</sub> | 3.11, s                   |                                     | C-16              |             |
| 18a  | 31.1, CH <sub>3</sub> | 0.95, s                   |                                     | C-4, C-17, C-19   | H-19, H-20a |
| 20a  | 30.9, CH <sub>2</sub> | 1.19, m<br>1.72, m        | H-20                                |                   |             |
| 20b  | 25.3, CH <sub>2</sub> | 1.19, m<br>1.51, m        | H-20a, H-20c                        |                   |             |
| 20c  | 29.1, CH <sub>2</sub> | 1.23, m                   | H-20b                               |                   |             |
| 20d  | 31.7, CH <sub>2</sub> | 1.22, m                   |                                     |                   |             |
| 20e  | 22.1, CH <sub>2</sub> | 1.28, m                   | H-20f                               |                   |             |
| 20f  | 14.0, CH <sub>3</sub> | 0.86, t (7.1)             | H-20e                               | C-20d, C-20e      |             |
| N-H  |                       | 8.63, s                   |                                     | C-2, C-19, C-20   |             |

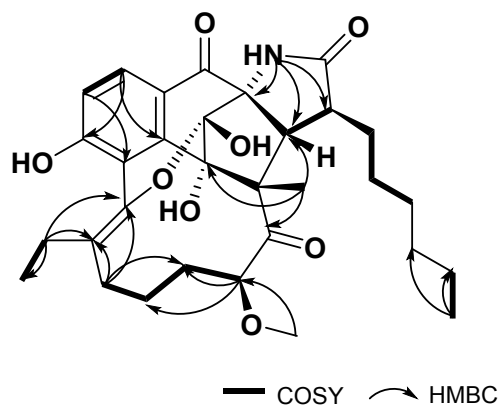

**Fig S3:** Selected  $^1\text{H}$ - $^1\text{H}$  COSY and HMBC correlations for neoansamycin F.

**Table S4:** NMR spectroscopy data for neoansamycin G (in CD<sub>3</sub>OD).

| Pos. | $\delta_C$ , type     | $\delta_H$ , Mult (J, Hz)        | <sup>1</sup> H- <sup>1</sup> H COSY | HMBC                              |
|------|-----------------------|----------------------------------|-------------------------------------|-----------------------------------|
| 1    | 194.4, C              |                                  |                                     |                                   |
| 2    | 70.2, C               |                                  |                                     |                                   |
| 3    | 50.1, CH <sub>2</sub> | 2.46, d (10.9)<br>2.76, d (10.9) |                                     | C-1, C-2, C-4, C-5, C-18          |
| 4    | 90.1, C               |                                  |                                     |                                   |
| 5    | 156.71, C             |                                  |                                     |                                   |
| 6    | 121.4, C              |                                  |                                     |                                   |
| 7    | 129.6, CH             | 7.89, d (8.6)                    | H-8                                 | C-1, C-5, C-9                     |
| 8    | 117.2, CH             | 7.33, d (8.7)                    | H-7                                 | C-9, C-10, C-11                   |
| 9    | 156.72, C             |                                  |                                     |                                   |
| 10   | 121.8, C              |                                  |                                     |                                   |
| 11   | 149.8, C              |                                  |                                     |                                   |
| 12   | 120.9, C              |                                  |                                     |                                   |
| 13   | 30.5, CH <sub>2</sub> | 2.16, m                          |                                     |                                   |
| 14   | 25.1, CH <sub>2</sub> | 2.01, m                          | H-15                                |                                   |
| 15   | 32.4, CH <sub>2</sub> | 1.47, m                          | H-14                                | C-13, C-16                        |
| 16   | 88.7, CH              | 5.00, d (7.4)                    | H-15                                | C-14, C-16a, C-18a                |
| 17   | 215.9, C              |                                  |                                     |                                   |
| 18   | 61.9, C               |                                  |                                     |                                   |
| 19   | 60.7, CH              | 2.28, d (10.0)                   | H-20                                | C-1, C-2, C-16, C-18, C-20, C-20a |
| 20   | 46.9, CH              | 2.68, m                          | H-19, H-20a                         | C-18, C-21                        |
| 21   | 180.4, C              |                                  |                                     |                                   |
| 12a  | 25.6, CH <sub>2</sub> | 2.61, m<br>2.72, m               | H-12b                               | C-11, C-12, C-12b, C-13           |
| 12b  | 15.0, CH <sub>3</sub> | 1.19, t (7.4)                    | H-12a                               | C-12, C-12a                       |
| 16a  | 58.9, CH <sub>3</sub> | 3.38, s                          |                                     | C-16                              |
| 18a  | 31.2, CH <sub>3</sub> | 1.09, s                          |                                     | C-4, C-19                         |
| 20a  | 31.9, CH <sub>2</sub> | 1.89, m                          | H-20, H-20b                         |                                   |
| 20b  | 27.0, CH <sub>2</sub> | 1.29, m                          |                                     | C-20d                             |
| 20c  | 33.4, CH <sub>2</sub> | 1.37, m                          |                                     |                                   |
| 20d  | 23.7, CH <sub>2</sub> | 1.32, m                          | H-20e                               | C-20c                             |
| 20e  | 14.4, CH <sub>3</sub> | 0.92, t (7.1)                    | H-20d                               | C-20c, C-20d                      |
| 1'   | 101.0, CH             | 5.42, d (7.6)                    | H-2'                                | C-9                               |
| 2'   | 74.3, CH              | 3.63, m                          | H-1', H-3'                          | C-1', C-3'                        |
| 3'   | 77.8, CH              | 3.55, m                          | H-2', H-4'                          | C-2', C-4'                        |
| 4'   | 72.7, CH              | 3.67, m                          | H-5'                                | C-5', C-6'                        |
| 5'   | 76.9, CH              | 4.18, d (9.6)                    | H-4'                                | C-1', C-3', C-4', C-6'            |
| 6'   | 170.7, C              |                                  |                                     |                                   |
| 7'   | 53.0, CH <sub>3</sub> | 3.77, s                          |                                     | C-6'                              |

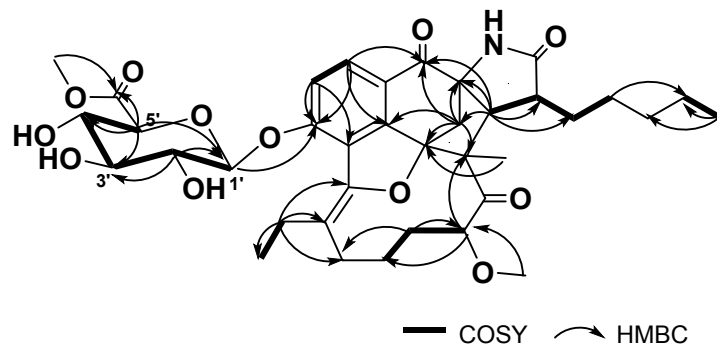

**Fig S4:** Selected  $^1\text{H}$ - $^1\text{H}$  COSY and HMBC correlations for neoansamycin G.

**Table S5:** NMR spectroscopy data for neoansamycin H (in CD<sub>3</sub>OD).

| Pos. | $\delta_C$ , type     | $\delta_H$ , Mult (J, Hz)        | <sup>1</sup> H- <sup>1</sup> H COSY | HMBC                                            | NOESY |
|------|-----------------------|----------------------------------|-------------------------------------|-------------------------------------------------|-------|
| 1    | 194.2, C              |                                  |                                     |                                                 |       |
| 2    | 69.7, C               |                                  |                                     |                                                 |       |
| 3    | 52.2, CH <sub>2</sub> | 2.83, d (10.2)<br>3.10, d (11.7) | H-19                                | C-1, C-2, C-4, C-5, C-10                        |       |
| 4    | 84.6, C               |                                  |                                     |                                                 |       |
| 5    | 150.7, C              |                                  |                                     |                                                 |       |
| 6    | 121.3, C              |                                  |                                     |                                                 |       |
| 7    | 138.0, CH             | 8.29, d (8.6)                    | H-8                                 | C-1, C-5, C-9                                   |       |
| 8    | 119.9, CH             | 7.15, d (8.7)                    | H-7                                 | C-6, C-10                                       |       |
| 9    | 166.7, C              |                                  |                                     |                                                 |       |
| 10   | 114.3, C              |                                  |                                     |                                                 |       |
| 11   | 203.8, C              |                                  |                                     |                                                 |       |
| 12   | 85.8, C               |                                  |                                     |                                                 |       |
| 13   | 26.5, CH <sub>2</sub> | 1.49, m                          |                                     | C-12                                            |       |
| 14   | 19.8, CH <sub>2</sub> | 1.83, m<br>2.00, m               | H-15, H-16                          |                                                 |       |
| 15   | 35.1, CH <sub>2</sub> | 2.05, m                          | H-14                                |                                                 |       |
| 16   | 87.1, CH              | 4.79, d (9.0)                    | H-15                                | C-15, C-16a                                     |       |
| 17   | 214.8, C              |                                  |                                     |                                                 |       |
| 18   | 63.0, C               |                                  |                                     |                                                 |       |
| 19   | 61.1, CH              | 2.10, m                          | H-20                                | C-1, C-2, C-3, C-4, C-18,<br>C-18a, C-20, C-20a | H-18a |
| 20   | 45.9, CH              | 2.82, m                          | H-20a                               | C-18, C-19, C-20a, C-<br>20b, C-21              |       |
| 21   | 180.2, C              |                                  |                                     |                                                 |       |
| 12a  | 35.0, CH <sub>2</sub> | 1.76, m<br>1.94, m               | H-12b                               | C-11, C-12, C-12b                               | H-18a |
| 12b  | 8.6, CH <sub>3</sub>  | 0.80, t (7.3)                    | H-12a                               | C-12, C-12a                                     |       |
| 16a  | 57.5, CH <sub>3</sub> | 3.39, s                          |                                     | C-16                                            |       |
| 18a  | 27.5, CH <sub>3</sub> | 0.96, s                          |                                     | C-4, C-18, C-19                                 | H-19  |
| 20a  | 31.2, CH <sub>2</sub> | 1.53, m                          | H-20                                |                                                 | H-19  |
| 20b  | 26.6, CH <sub>2</sub> | 1.27, m                          | H-20a                               |                                                 |       |
| 20c  | 33.2, CH <sub>2</sub> | 1.24, m                          |                                     |                                                 |       |
| 20d  | 23.6, CH <sub>2</sub> | 1.30, m                          | H-20e                               | C-20c, C-20e                                    |       |
| 20e  | 14.5, CH <sub>3</sub> | 0.89, t (6.7)                    | H-20d                               | C-20c, C-20d                                    |       |

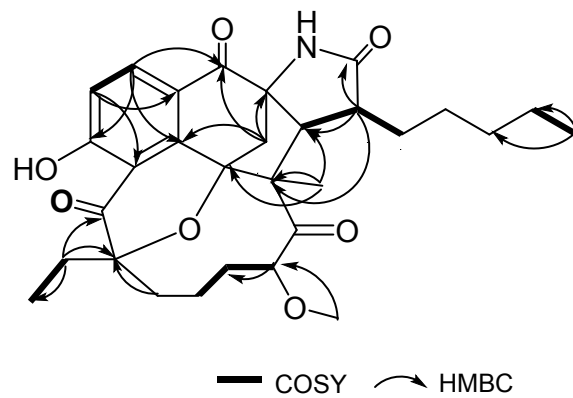

**Fig S5:** Selected  $^1\text{H}$ - $^1\text{H}$  COSY and HMBC correlations for neoansamycin H.

**Table S6:** NMR spectroscopy data for neoansamycin I (in DMSO).

| position | $\delta_C$ , type     | $\delta_H$ , Mult (J, Hz) | $^1H$ - $^1H$ COSY | HMBC                      |
|----------|-----------------------|---------------------------|--------------------|---------------------------|
| 1        | 195.3, C              |                           |                    |                           |
| 2        | 71.2, C               |                           |                    |                           |
| 3        | 70.2, CH              | 3.11, s                   |                    | C-1, C-2, C-4, C-17, C-18 |
| 4        | 195.1, C              |                           |                    |                           |
| 5        | 134.5, C              |                           |                    |                           |
| 6        | 129.3, C              |                           |                    |                           |
| 7        | 129.9, CH             | 7.85, d (8.6)             | H-8                | C-1, C-5                  |
| 8        | 122.4, CH             | 7.22, d (8.6)             | H-7                | C-6, C-10                 |
| 9        | 160.8, C              |                           |                    |                           |
| 10       | 124.5, C              |                           |                    |                           |
| 11       | 207.9, C              |                           |                    |                           |
| 12       | 53.5, CH              | 2.35, m                   | H-13               |                           |
| 13       | 29.6, CH <sub>2</sub> | 1.51, m<br>1.78, m        | H-12               |                           |
| 14       | 25.4, CH <sub>2</sub> | 1.45, m                   | H-13               |                           |
| 15       | 30.5, CH <sub>2</sub> | 1.21, m                   | H-16               |                           |
| 16       | 82.6, CH              | 3.24, d (8.3)             | H-15               | C-14, C-16a, C-17, C-18   |
| 17       | 88.8, C               |                           |                    |                           |
| 18       | 40.6, CH              | 2.16, m                   | H-18a              | C-18a, C-19, C-20         |
| 19       | 56.6, CH              | 2.33, m                   | H-18, H-20         | C-17                      |
| 20       | 42.3, CH              | 2.68, m                   | H-19, H-20a        |                           |
| 21       | 178.2, C              |                           |                    |                           |
| 12a      | 27.1, CH <sub>2</sub> | 1.46, m<br>2.00, m        | H-12b              |                           |
| 12b      | 11.3, CH <sub>3</sub> | 0.89, t (7.4)             | H-12a              | C-12, C-12a               |
| 16a      | 61.9, CH <sub>3</sub> | 3.40, s                   |                    | C-16                      |
| 18a      | 10.2, CH <sub>3</sub> | 0.92, d (6.8)             | H-18               | C-17, C-18, C-19          |
| 20a      | 32.6, CH <sub>2</sub> | 1.49, m                   | H-20               |                           |
| 20b      | 24.4, CH <sub>2</sub> | 1.19, m<br>1.26, m        | H-20a, H-20c       |                           |
| 20c      | 31.4, CH <sub>2</sub> | 1.22, m                   |                    |                           |
| 20d      | 22.0, CH <sub>2</sub> | 1.25, m<br>1.28, m        | H-20e              | C-20c                     |
| 20e      | 14.0, CH <sub>3</sub> | 0.86, t (7.2)             | H-20d              | C-20c, C-20d              |
| N-H      |                       | 7.41, s                   |                    | C-2, C-19, C-20           |

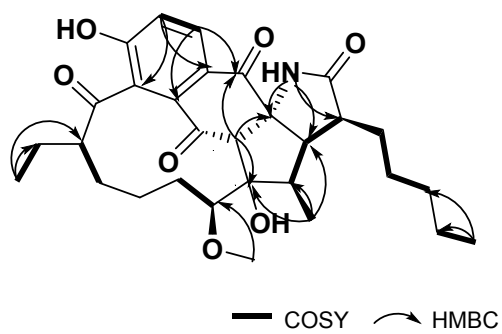

**Fig S6:** Selected  $^1\text{H}$ - $^1\text{H}$  COSY and HMBC correlations for neoansamycin I.



## Spectroscopic data informations

Figure S7.  $^1\text{H}$  NMR (600 MHz,  $\text{CD}_3\text{OD}$ ) spectrum for compound **1**

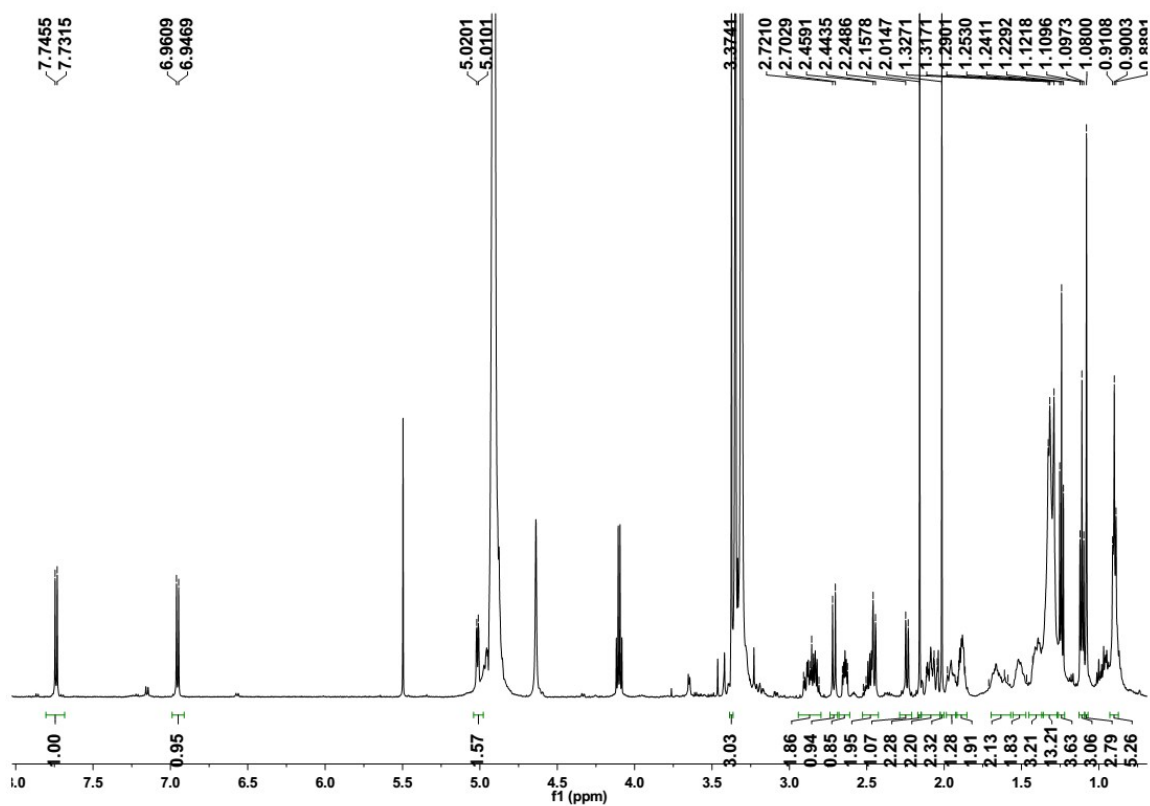

Figure S8.  $^{13}\text{C}$  NMR (151 MHz,  $\text{CD}_3\text{OD}$ ) spectrum for compound **1**

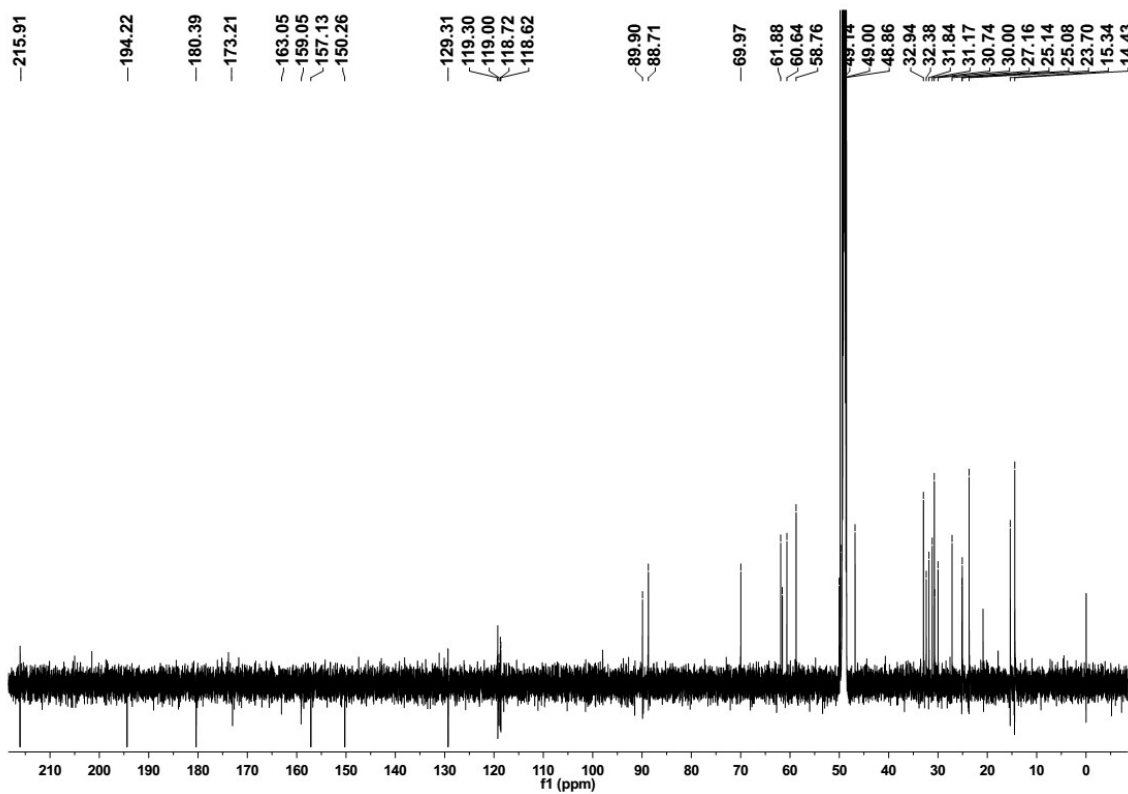

Figure S9. The HSQC spectrum for compound 1

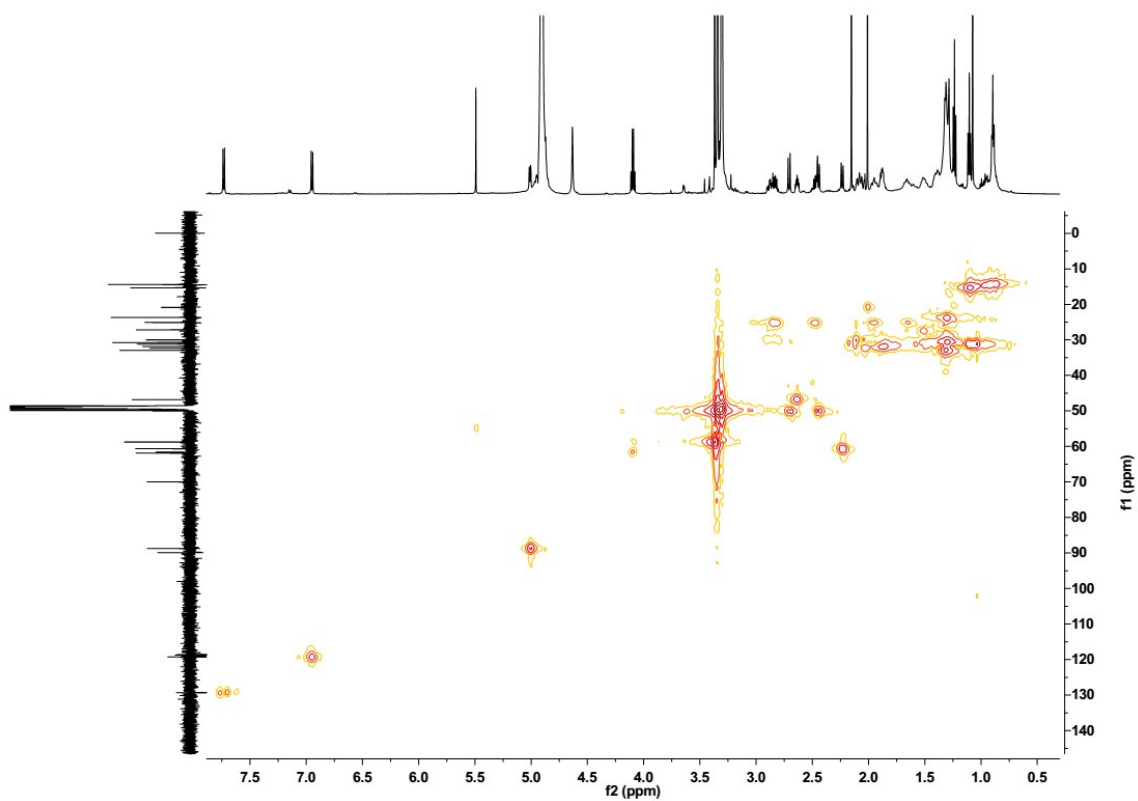

Figure S10. The HMBC spectrum for compound 1

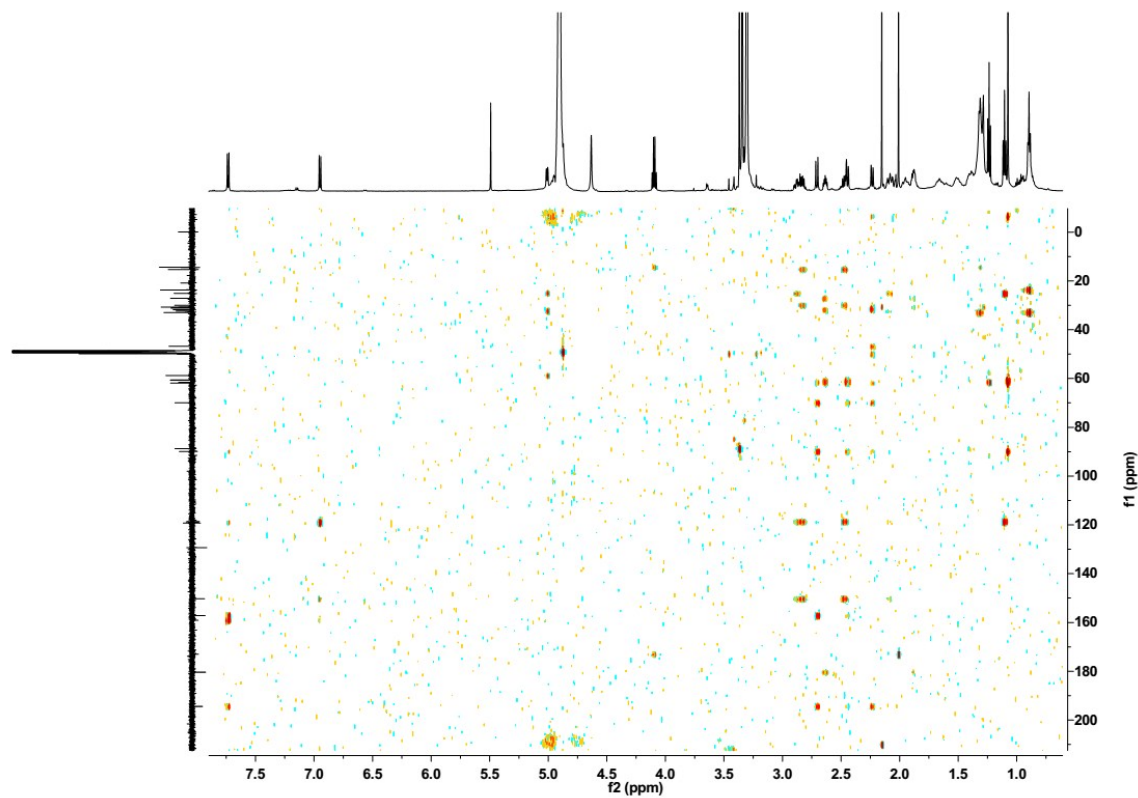

Figure S11.  $^1\text{H}/^1\text{H}$  COSY spectrum for compound 1

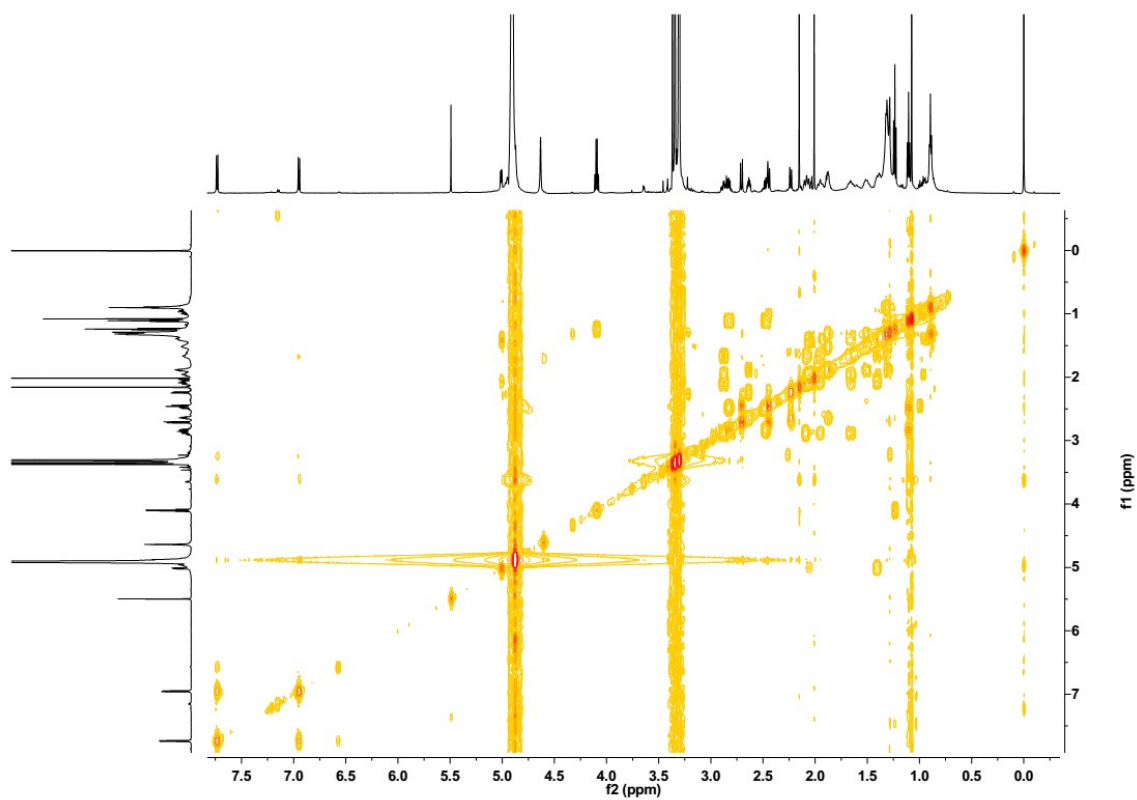

Figure S12. The NOESY spectrum for compound 1

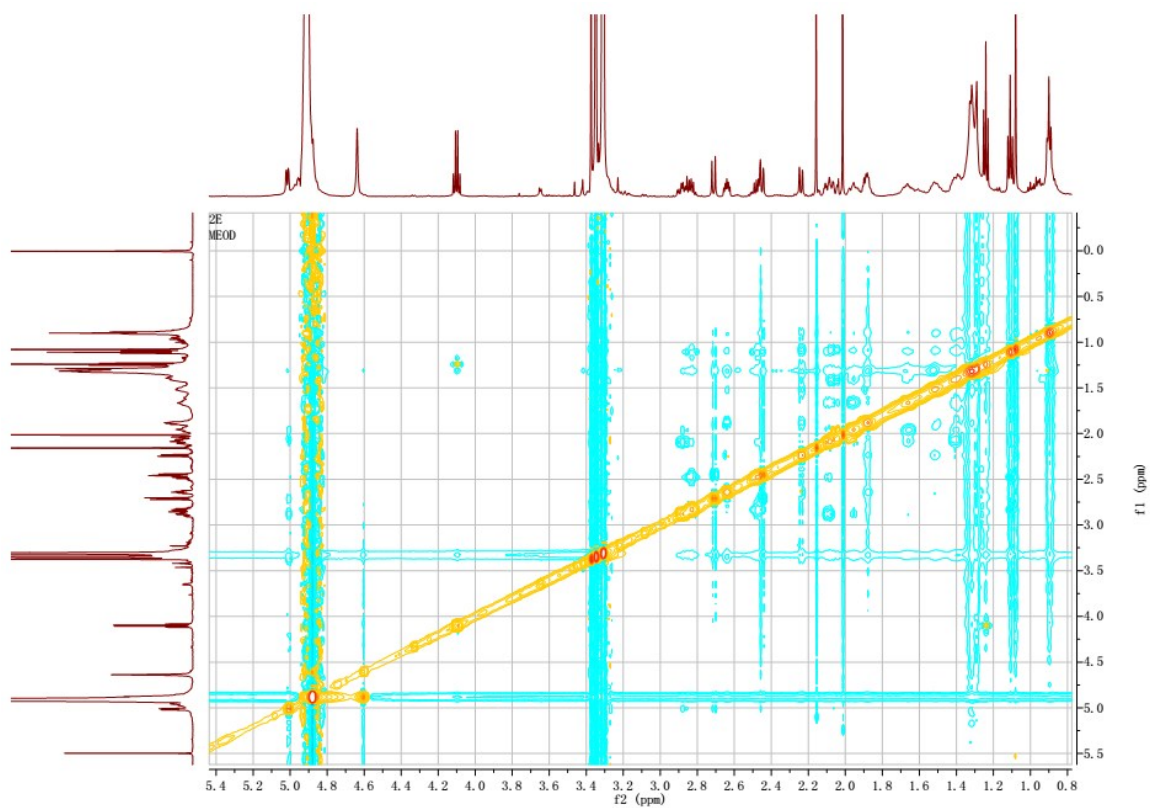

**Figure S13.** The HRMS-ESI spectrum for compound 1

2e #8-12 RT: 0.23-0.34 AV: 5 NL: 1.03E6  
T: FTMS + c ESI Full ms [300.00-1000.00]

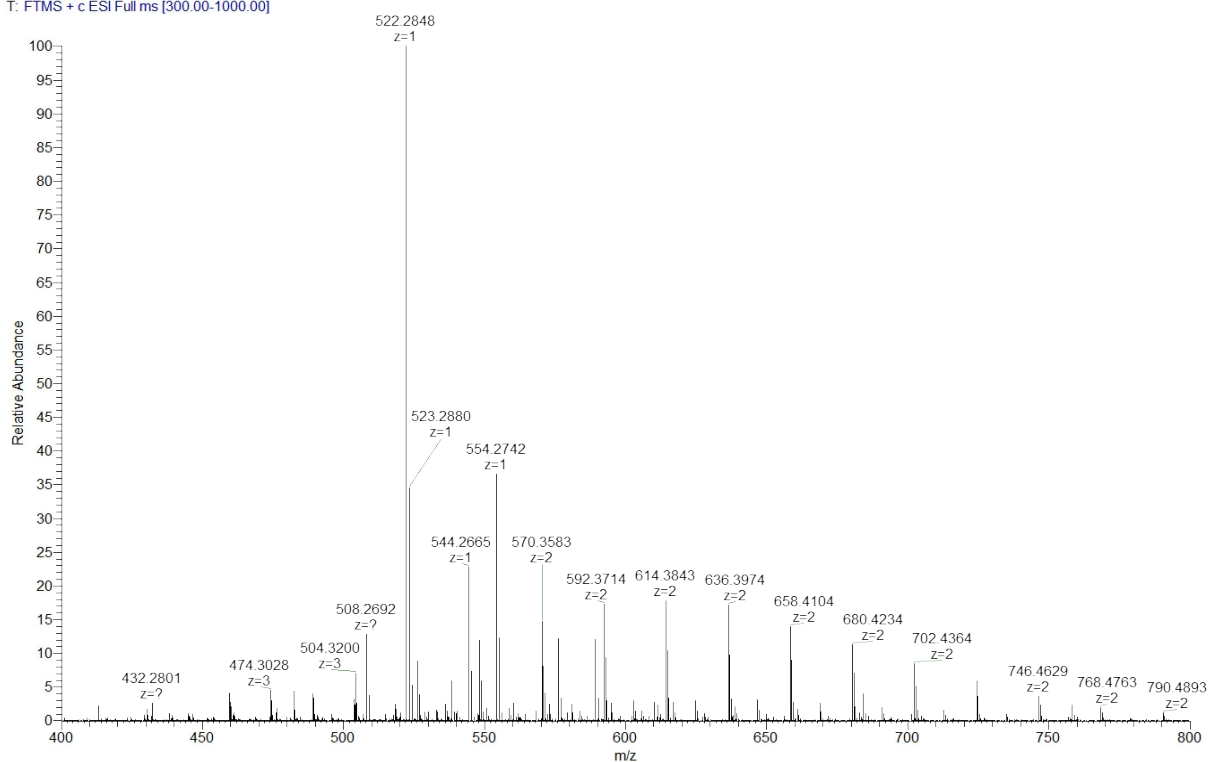

**Figure S14.** <sup>1</sup>H NMR (600 MHz, CD<sub>3</sub>OD) spectrum for compound 2

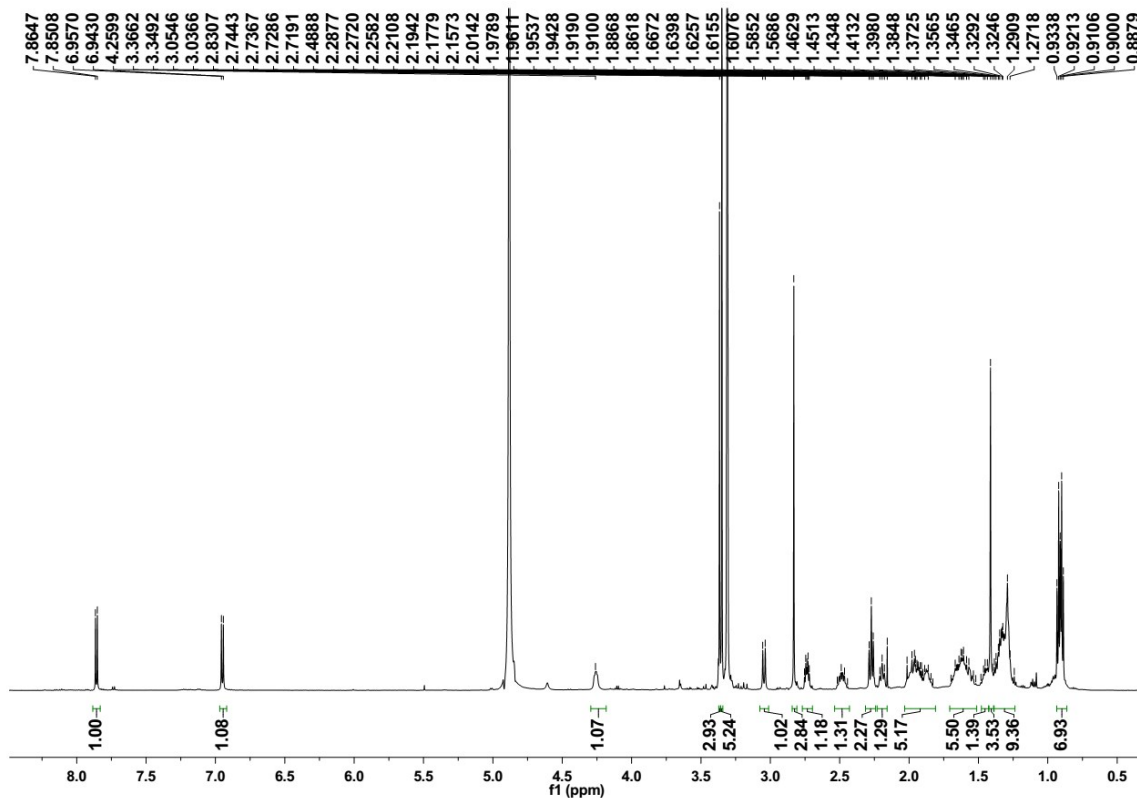

Figure S15.  $^{13}\text{C}$  NMR (151 MHz,  $\text{CD}_3\text{OD}$ ) spectrum for compound 2

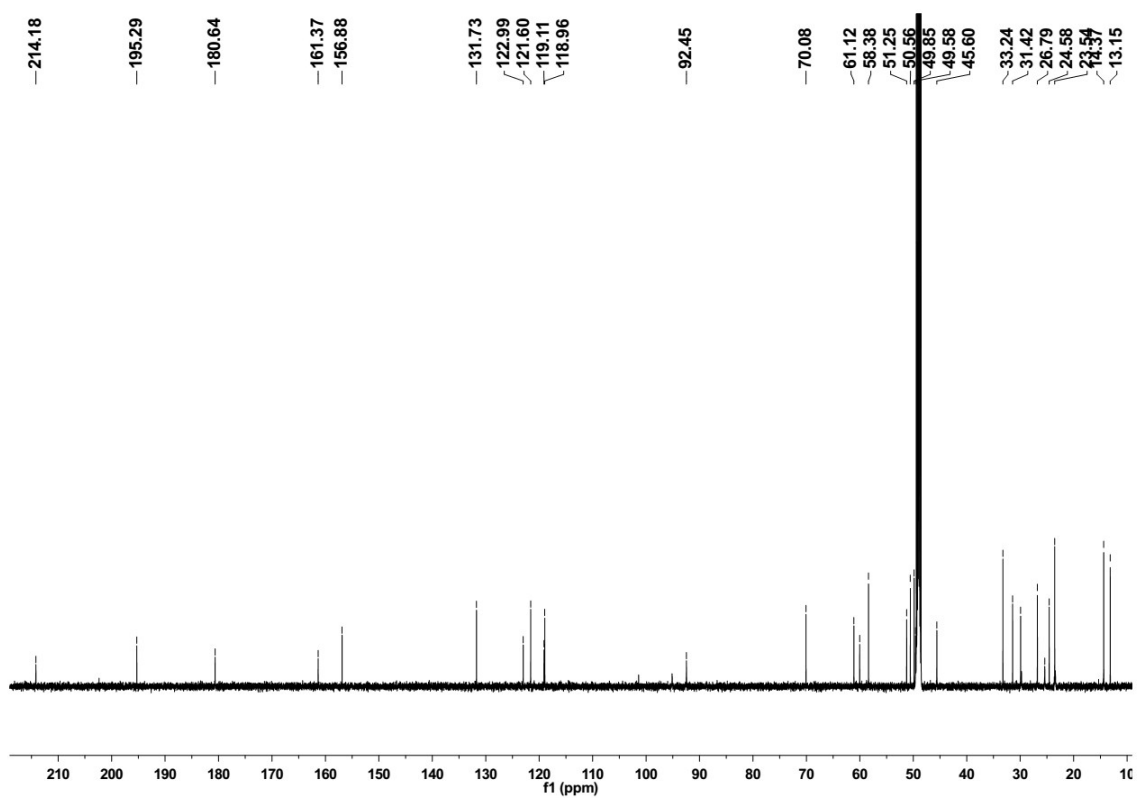

Figure S16. The HSQC spectrum for compound 2

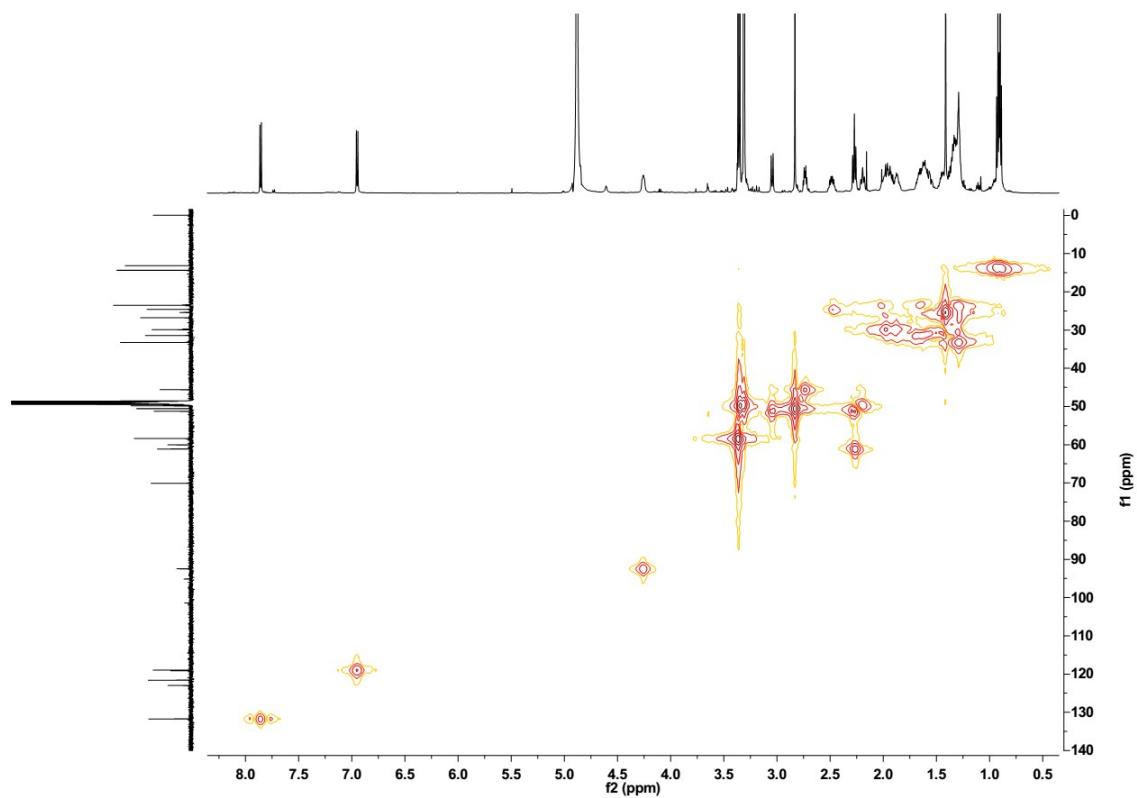

Figure S17. The HMBC spectrum for compound 2

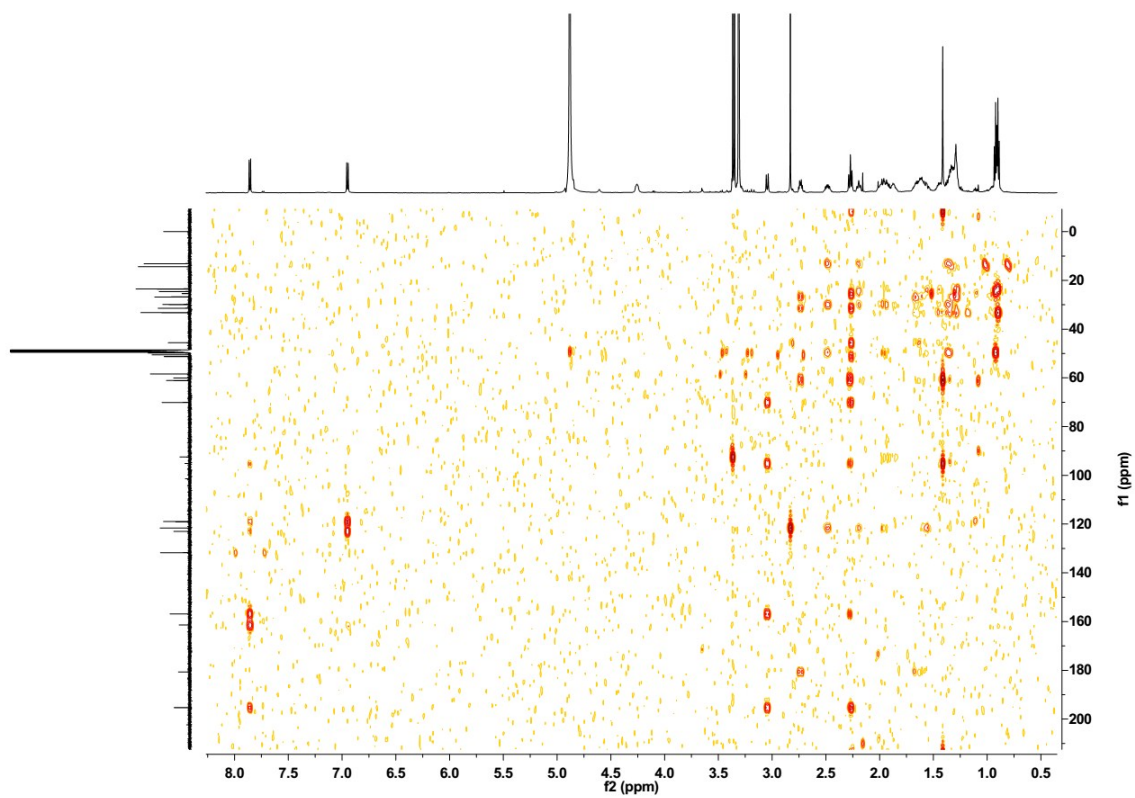

Figure S18.  $^1\text{H}/^1\text{H}$  COSY spectrum for compound 2

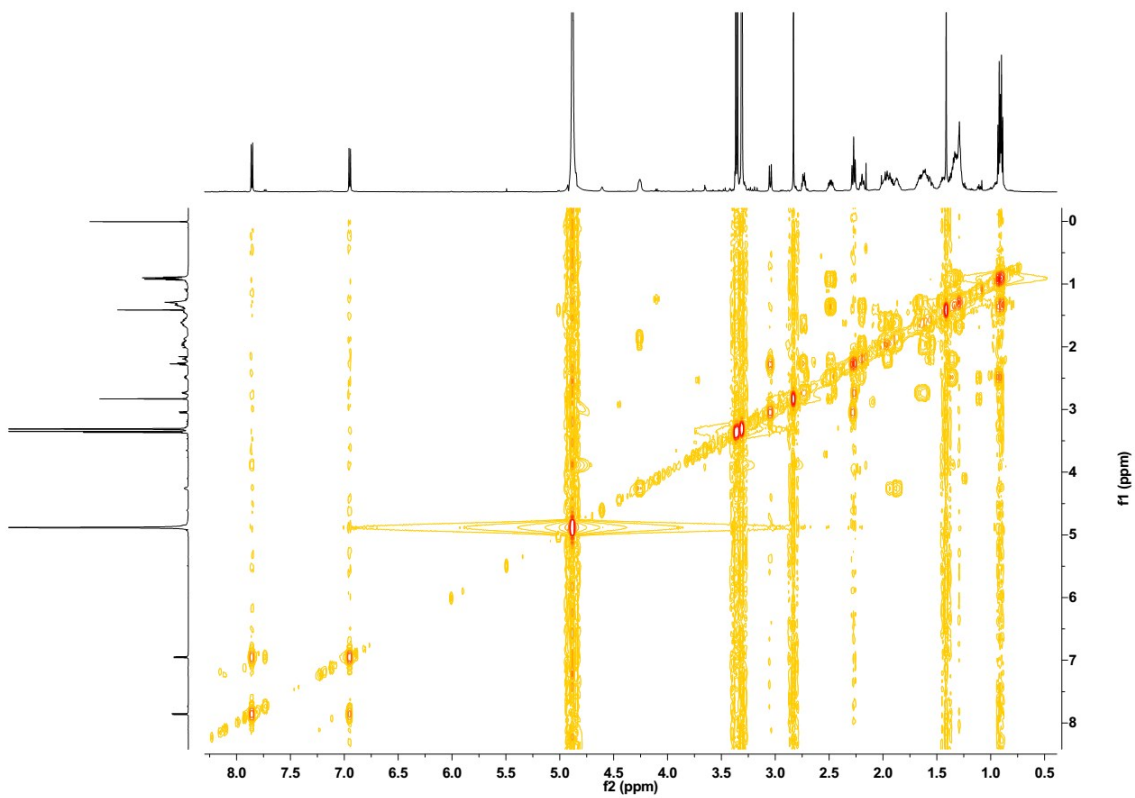

Figure S19. The HRMS-ESI spectrum for compound 2

2d-a #20 RT: 0.58 AV: 1 NL: 1.40E5  
T: FTMS + c ESI Full ms [300.00-1000.00]

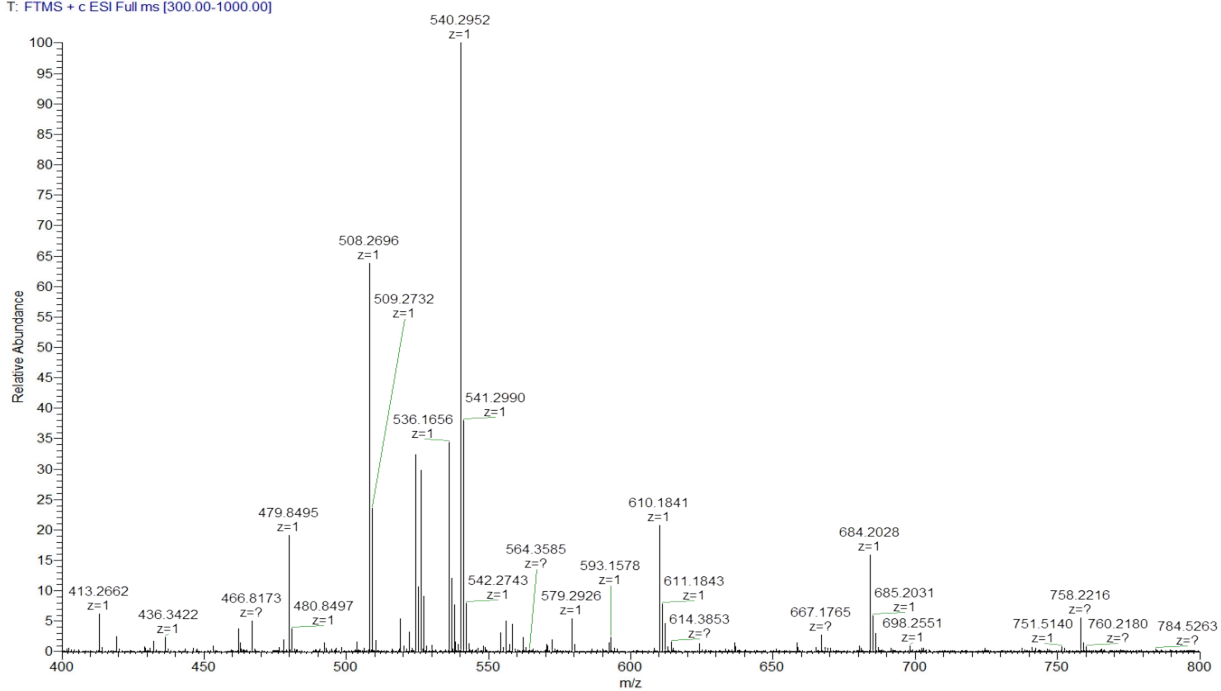

Figure S20. <sup>1</sup>H NMR (600 MHz, DMSO) spectrum for compound 3

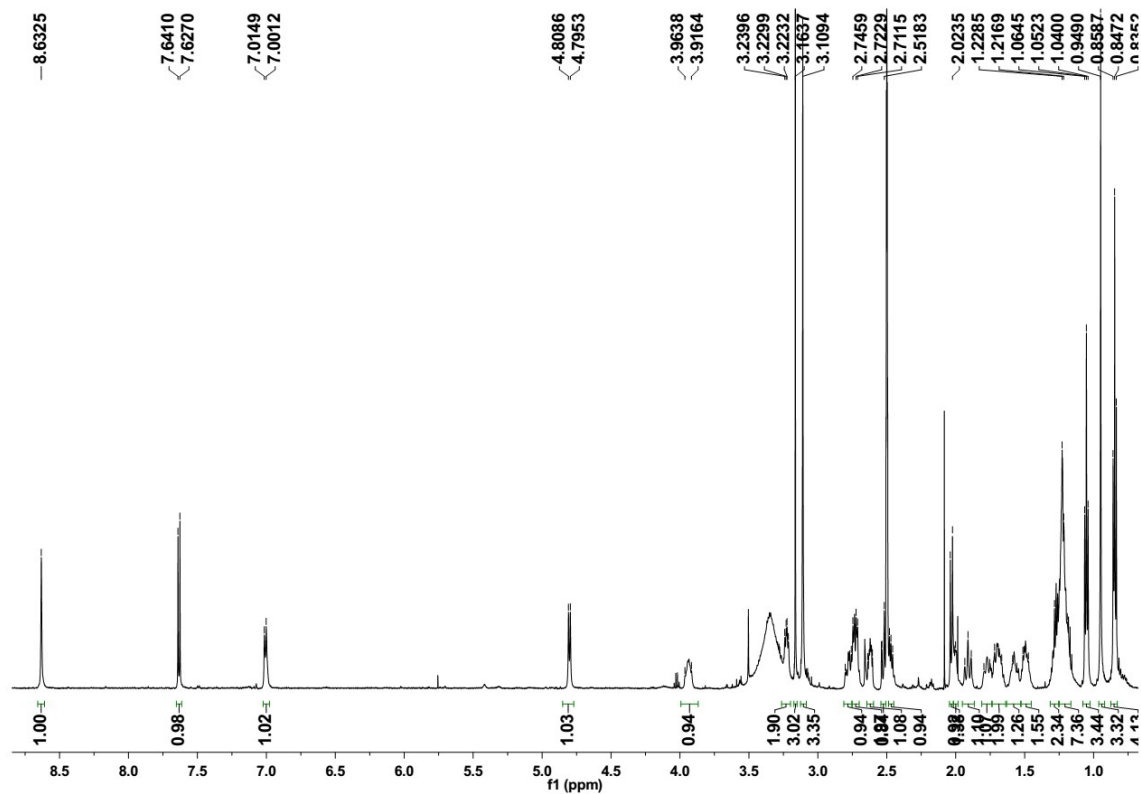

Figure S21.  $^{13}\text{C}$  NMR (151 MHz, DMSO) spectrum for compound **3**

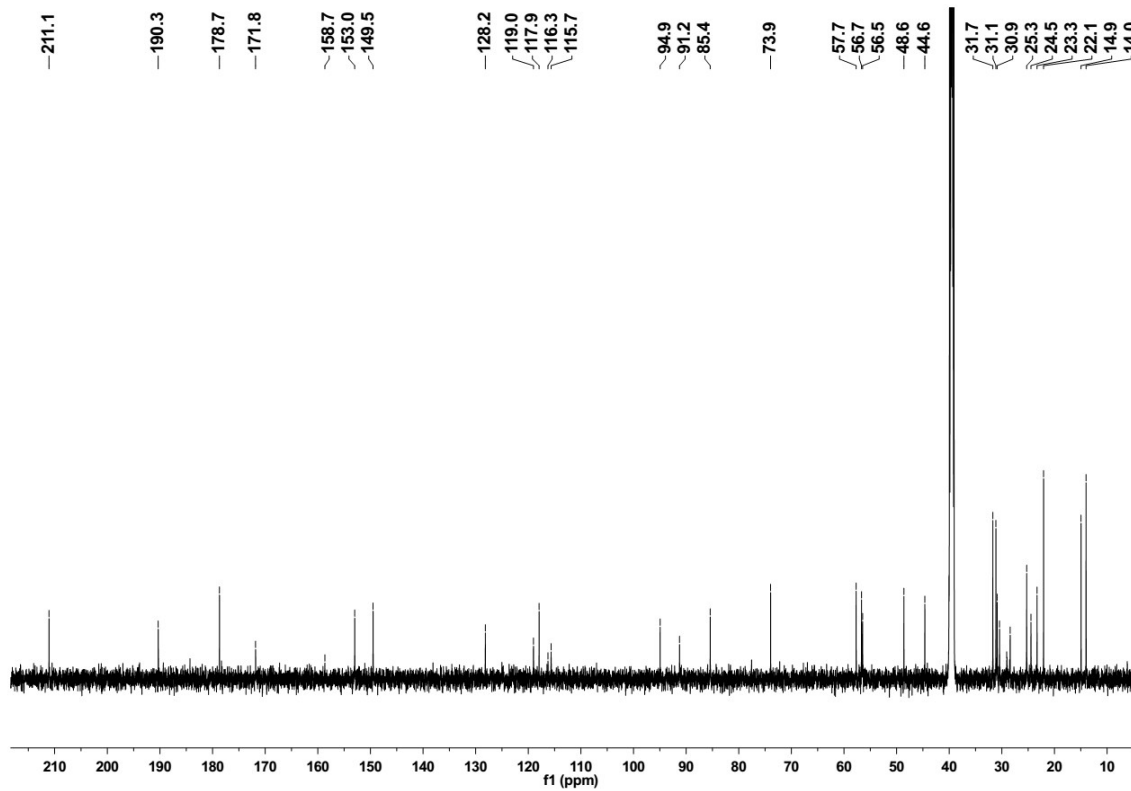

Figure S22. The HSQC spectrum for compound **3**

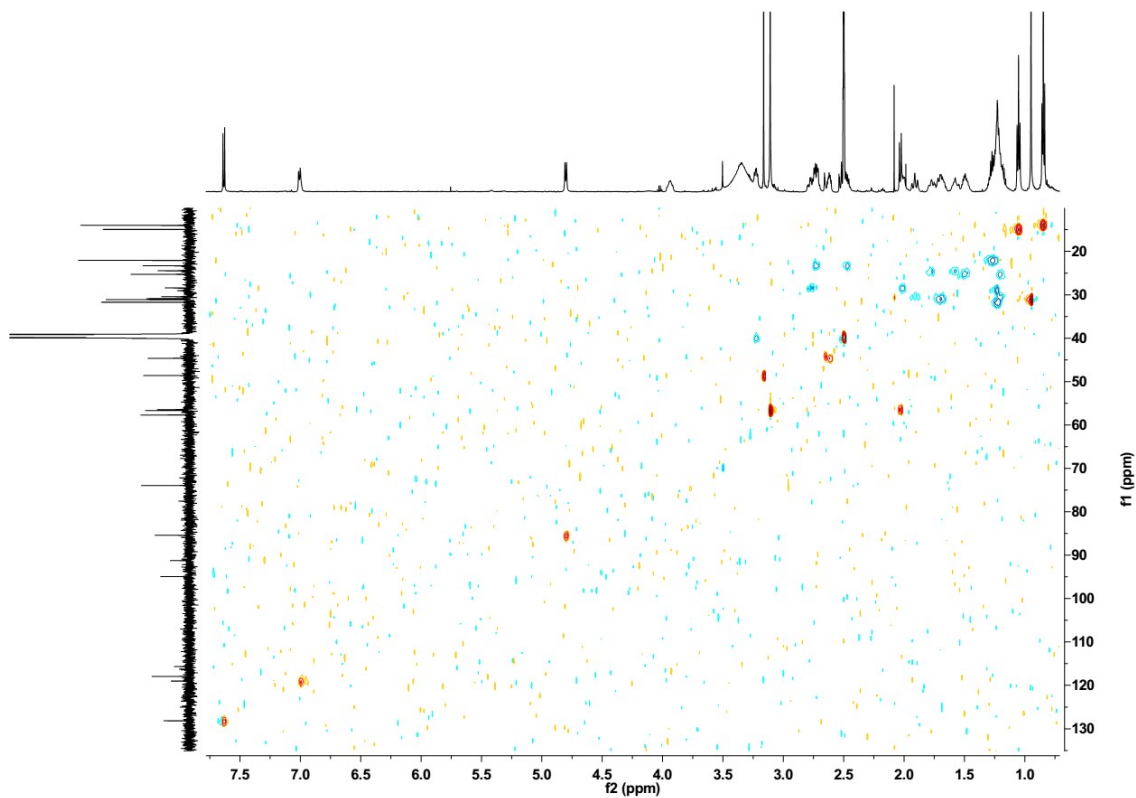



Figure S23. The HMBC spectrum for compound 3

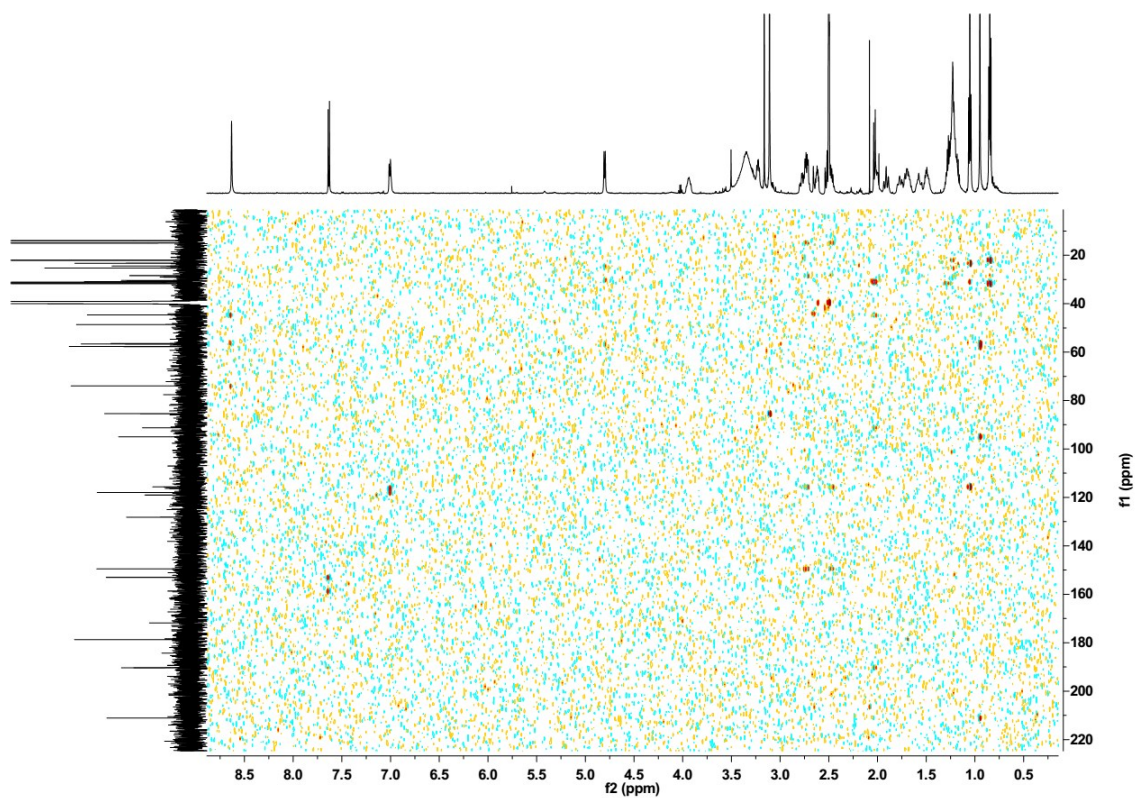

Figure S24. <sup>1</sup>H/<sup>1</sup>H COSY spectrum for compound 3

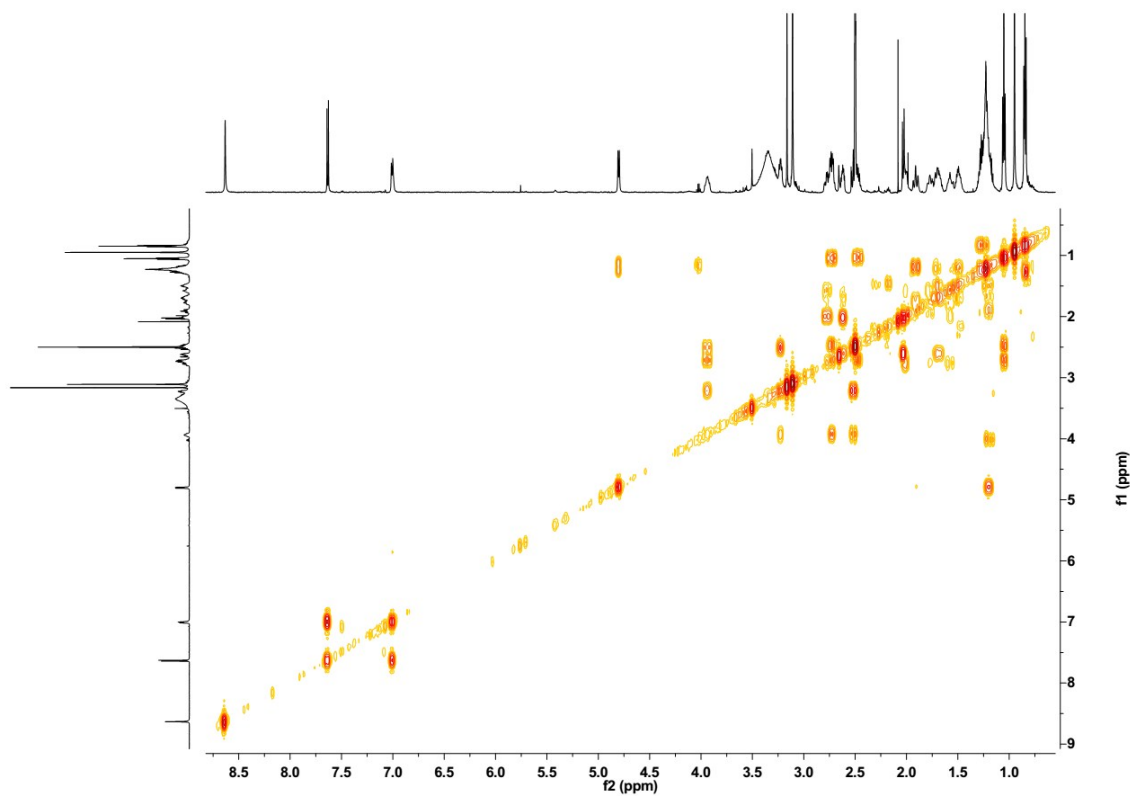

**Figure S25.** The NOESY spectrum for compound **3**

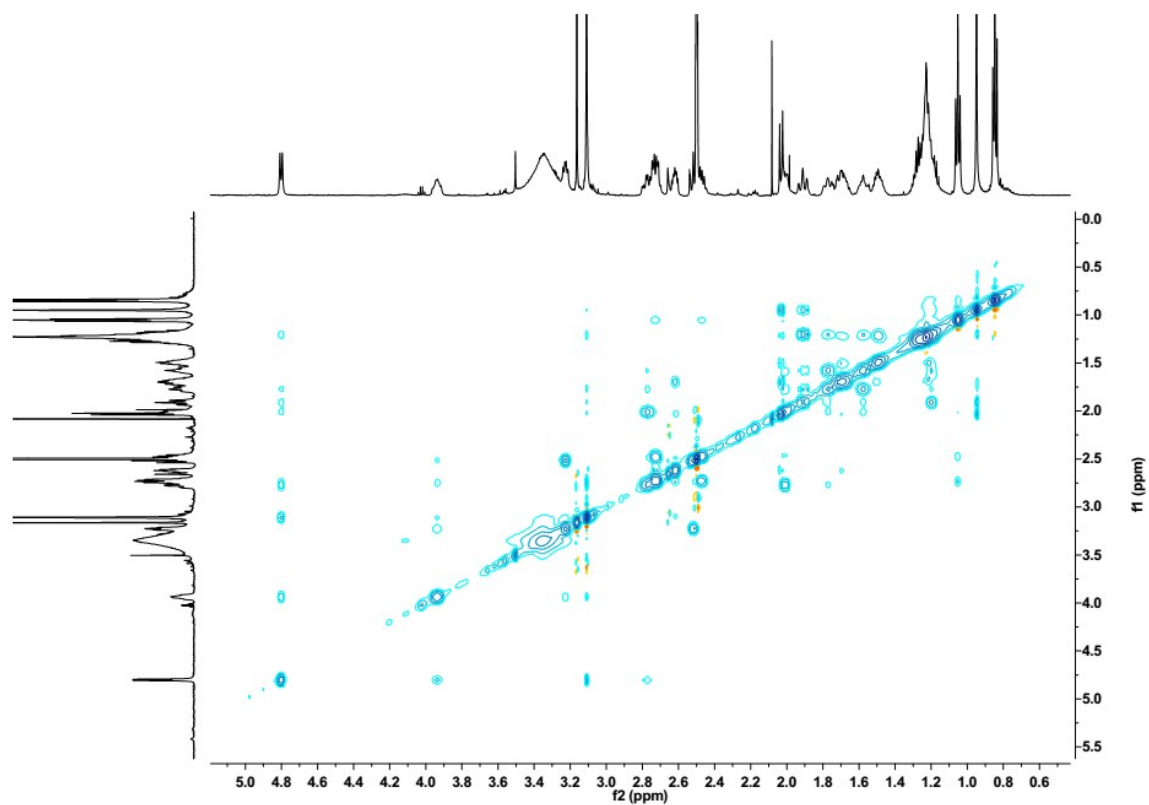

**Figure S26.** The HRMS-ESI spectrum for compound **3**

y4 #11 RT: 0.31 AV: 1 NL: 6.33E5  
T: FTMS + c ESI Full ms [300.00-1000.00]

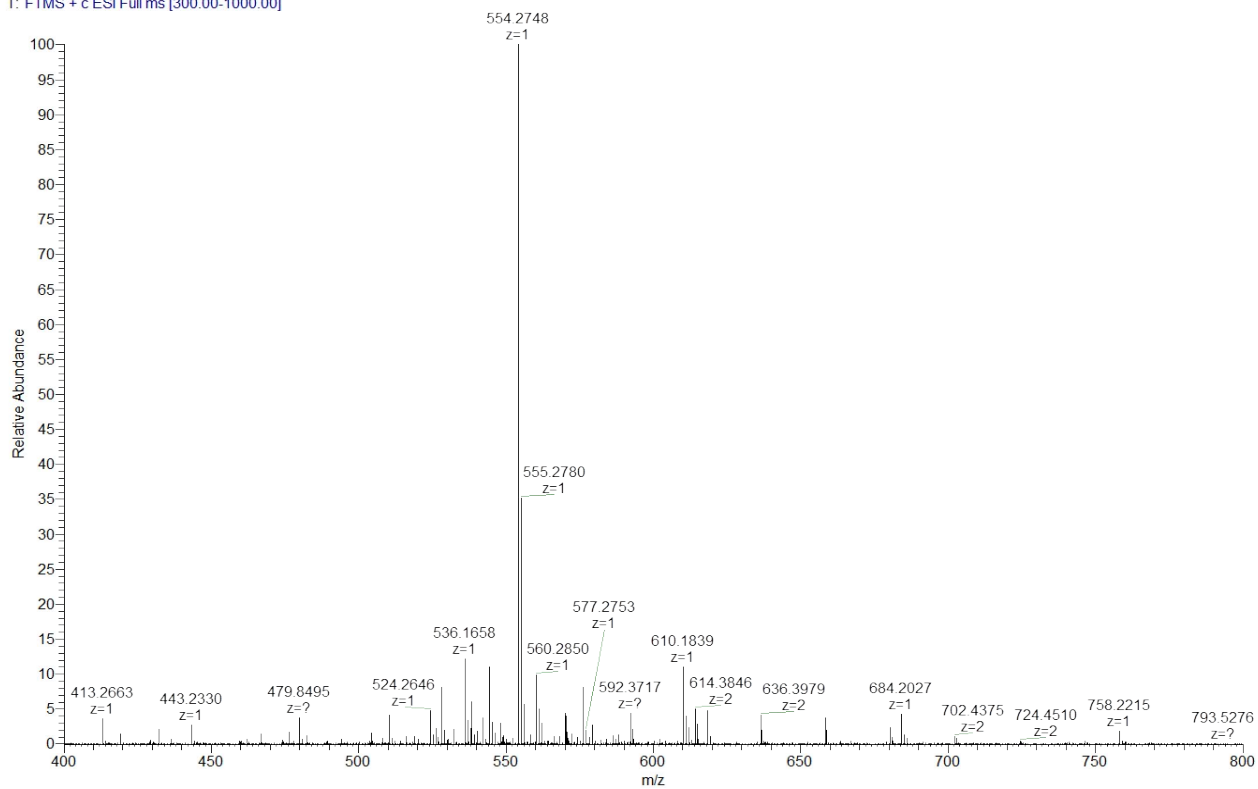

Figure S27. <sup>1</sup>H NMR (600 MHz, CD<sub>3</sub>OD) spectrum for compound 4

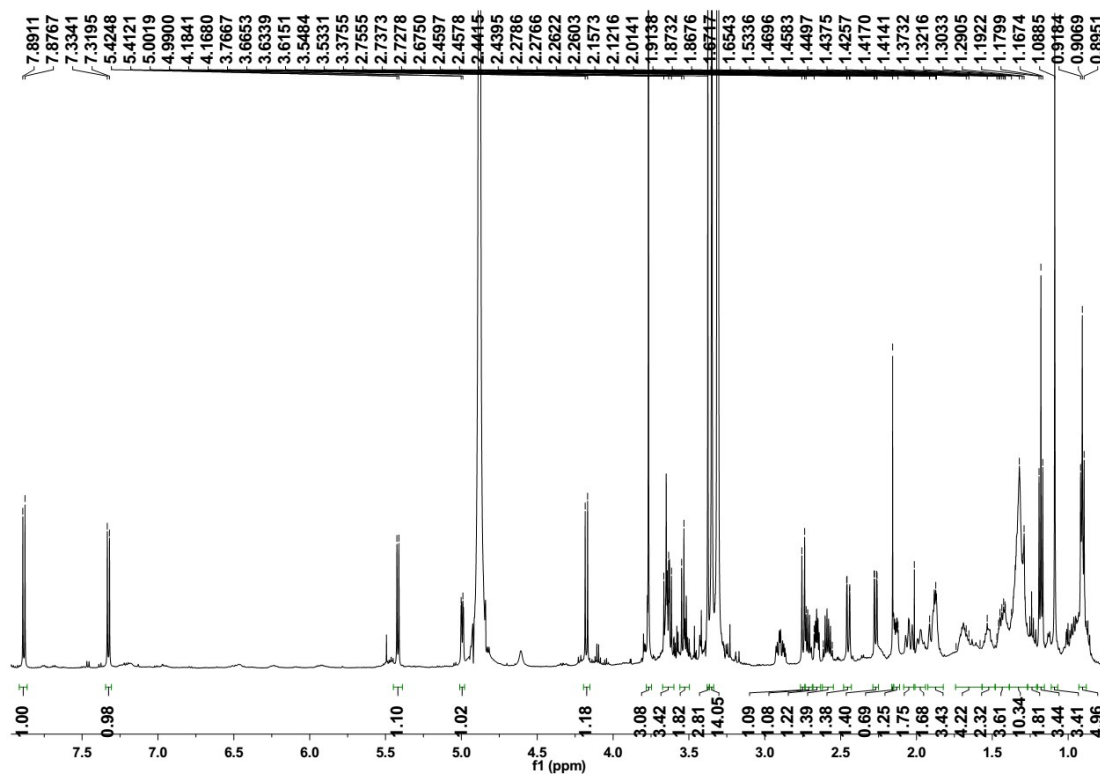

Figure S28. <sup>13</sup>C NMR (151 MHz, CD<sub>3</sub>OD) spectrum for compound 4

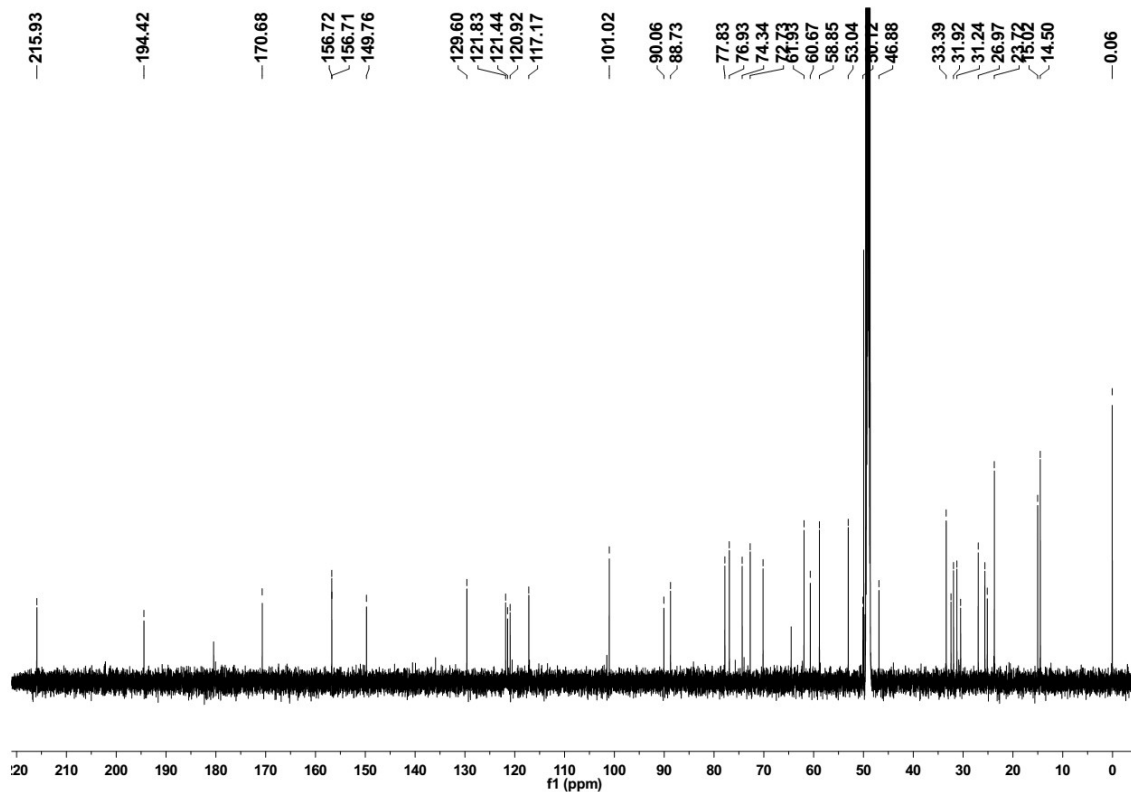

Figure S29. The HSQC spectrum for compound 4

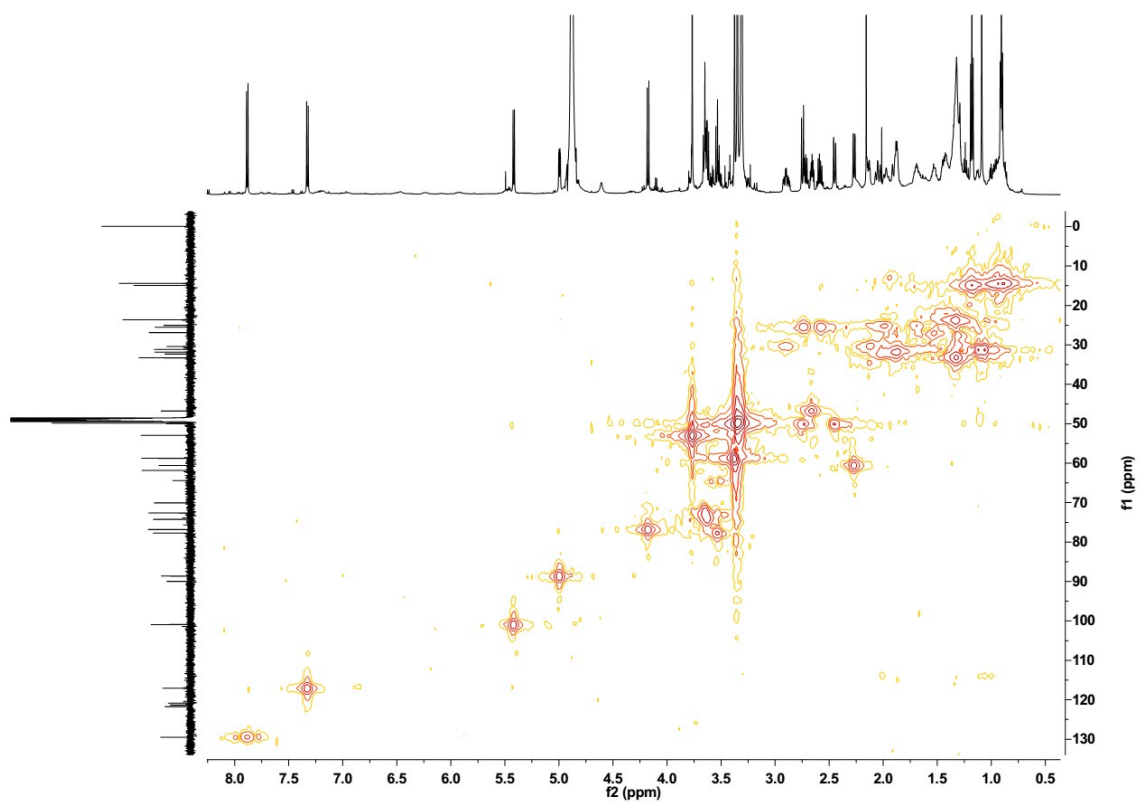

Figure S30. The HMBC spectrum for compound 4

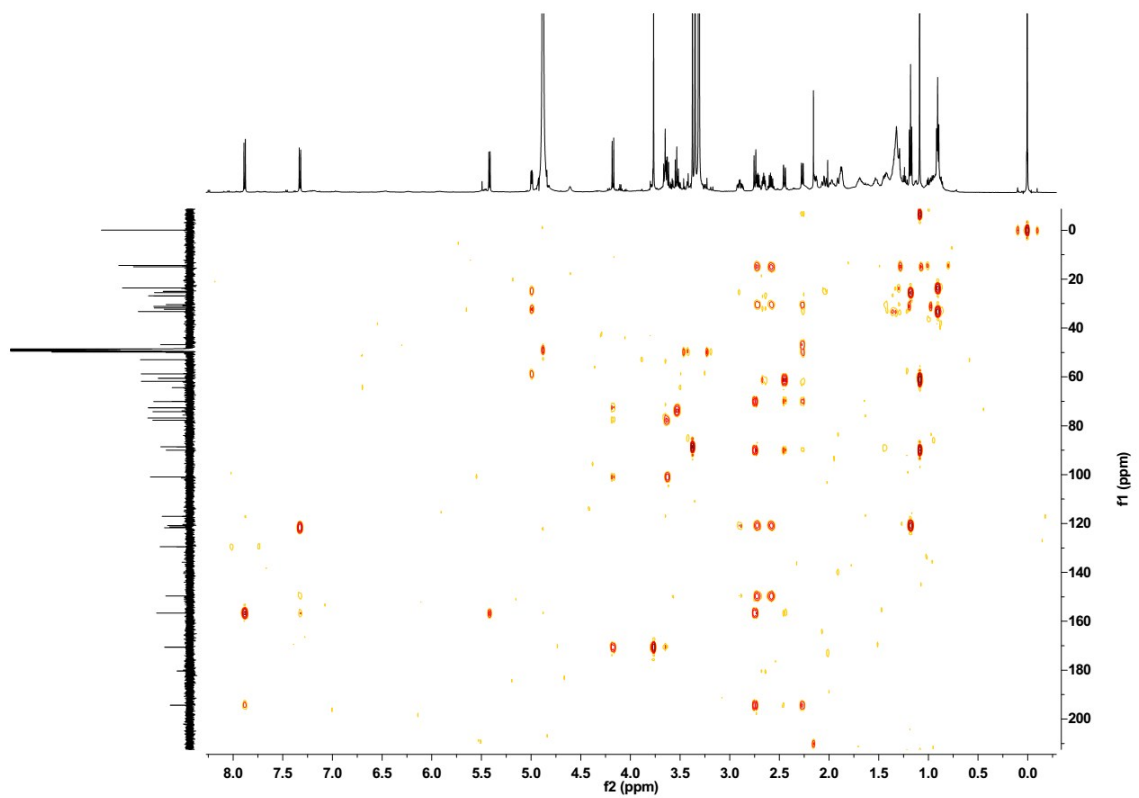

Figure S31.  $^1\text{H}/^1\text{H}$  COSY spectrum for compound 4

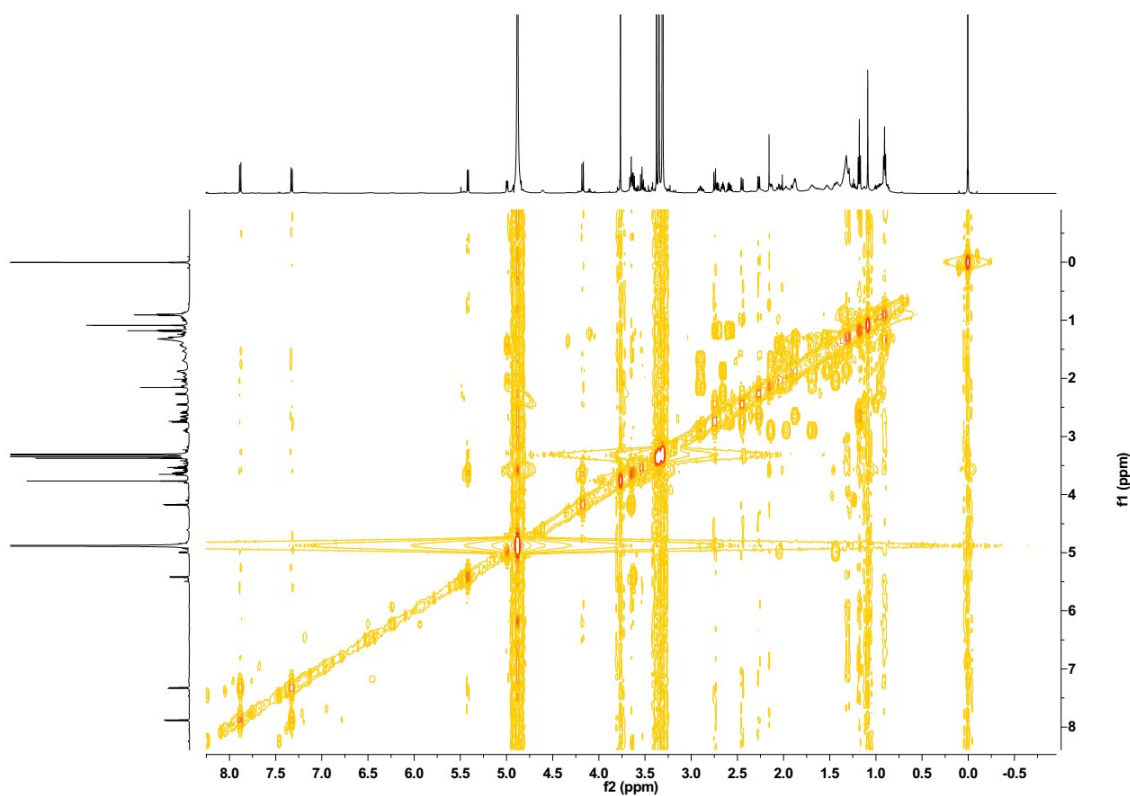

Figure S32. The HRMS-ESI spectrum for compound 4

3F #7-16 RT: 0.19-0.43 AV: 10 NL: 2.67E6  
T: FTMS + c ESI Full ms [300.00-1000.00]

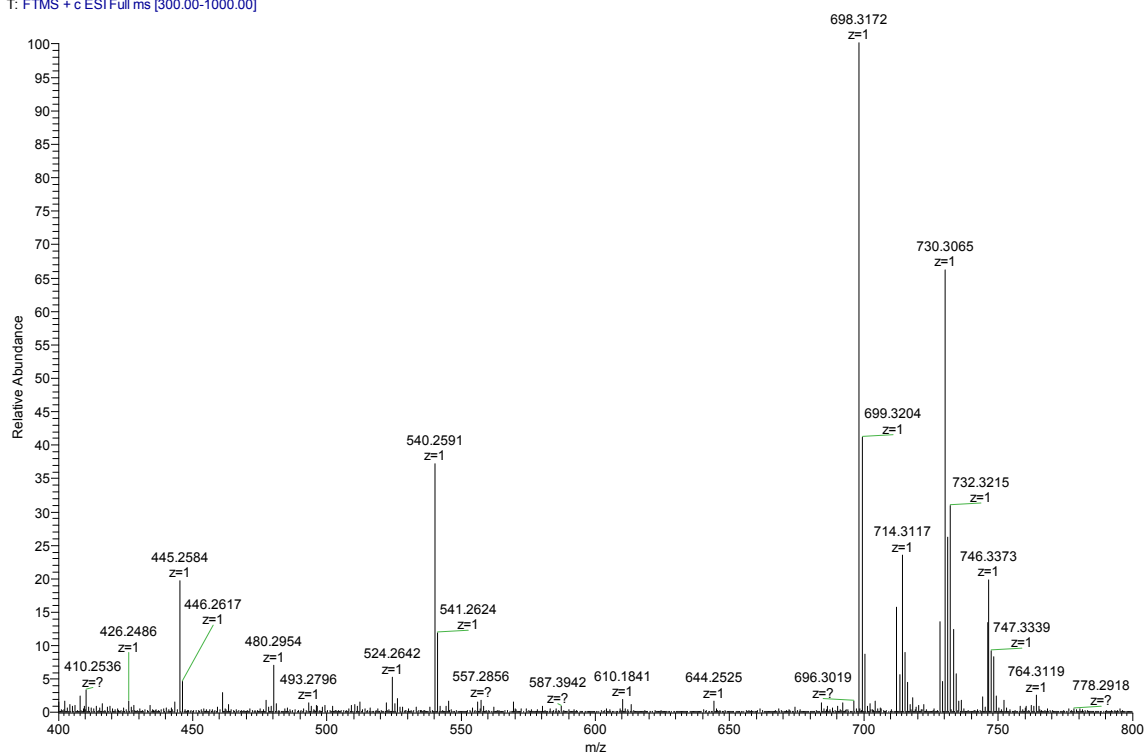

Figure S33. <sup>1</sup>H NMR (600 MHz, CD<sub>3</sub>OD) spectrum for compound 5

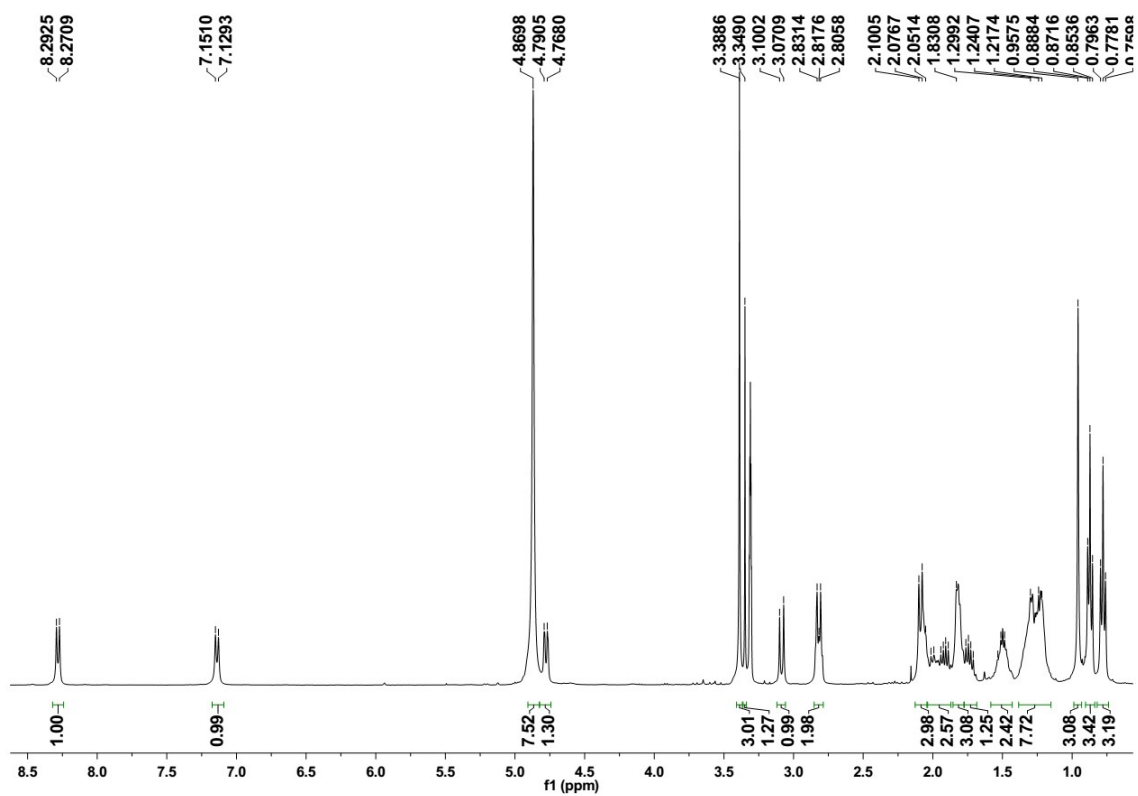

Figure S34. <sup>13</sup>C NMR (151 MHz, CD<sub>3</sub>OD) spectrum for compound 5

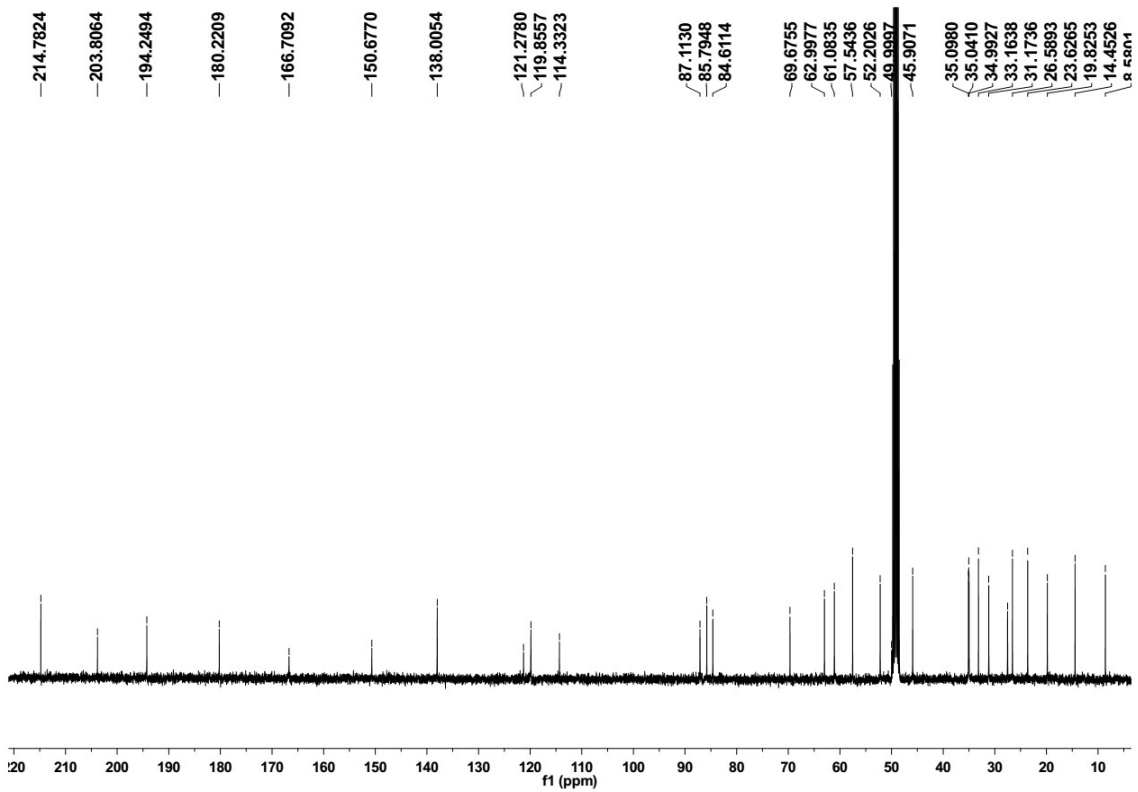

Figure S35. The HSQC spectrum for compound 5

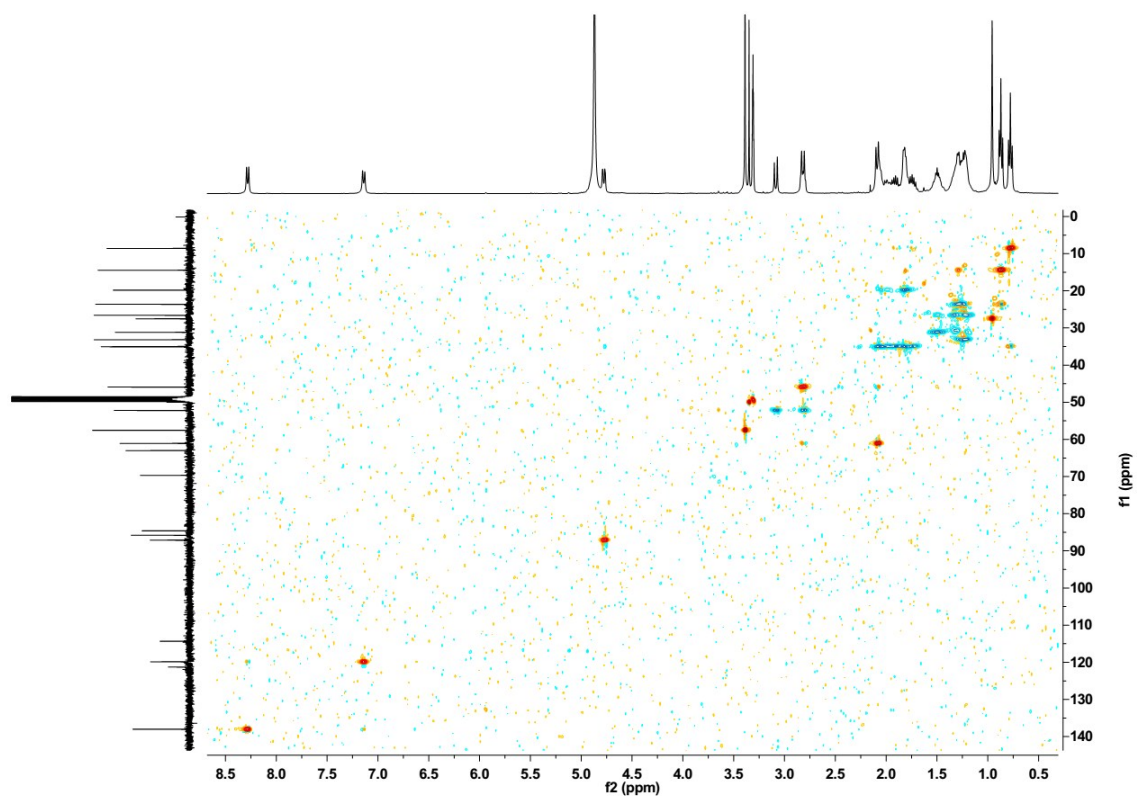

Figure S36. The HMBC spectrum for compound 5

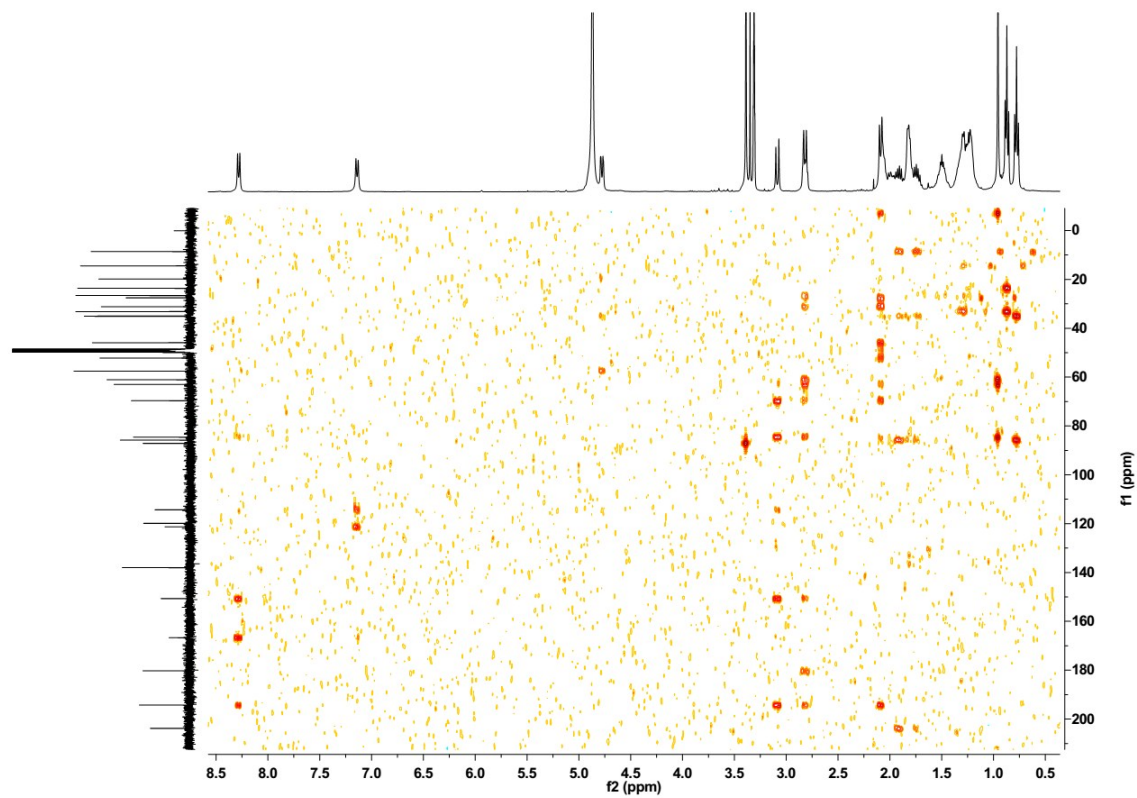

Figure S37.  $^1\text{H}/^1\text{H}$  COSY spectrum for compound **5**

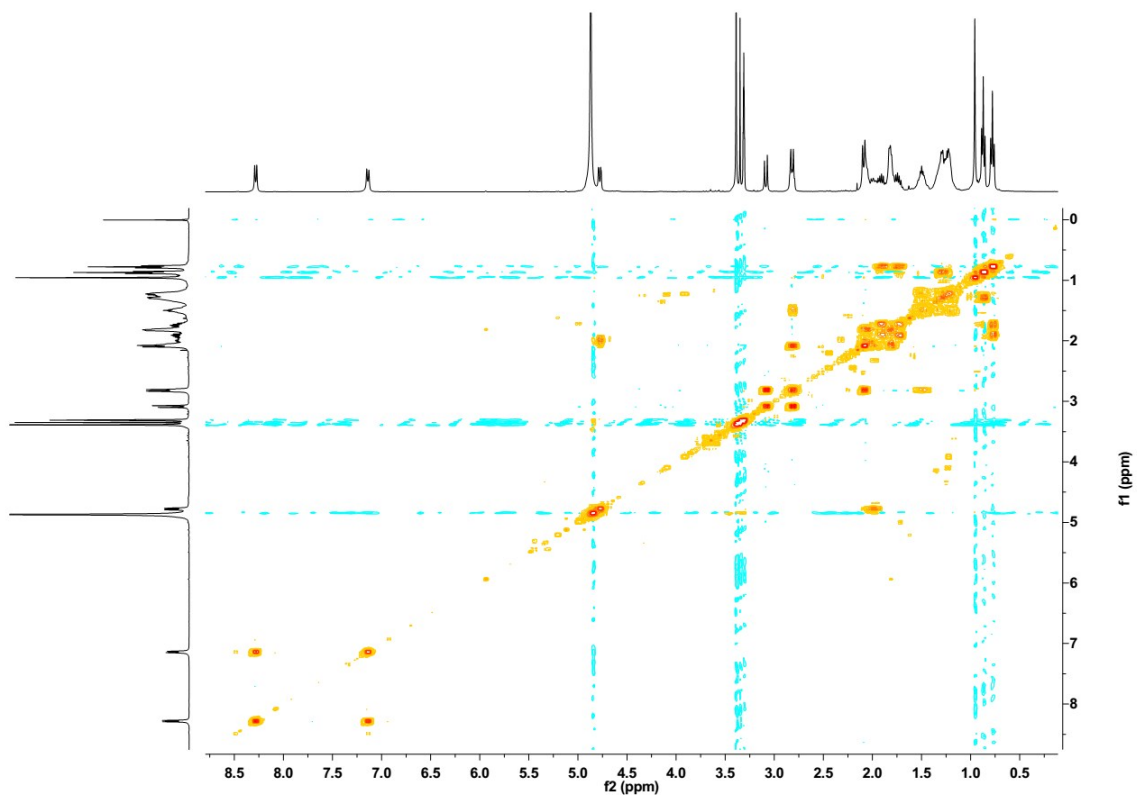

Figure S38. The NOESY spectrum for compound **5**

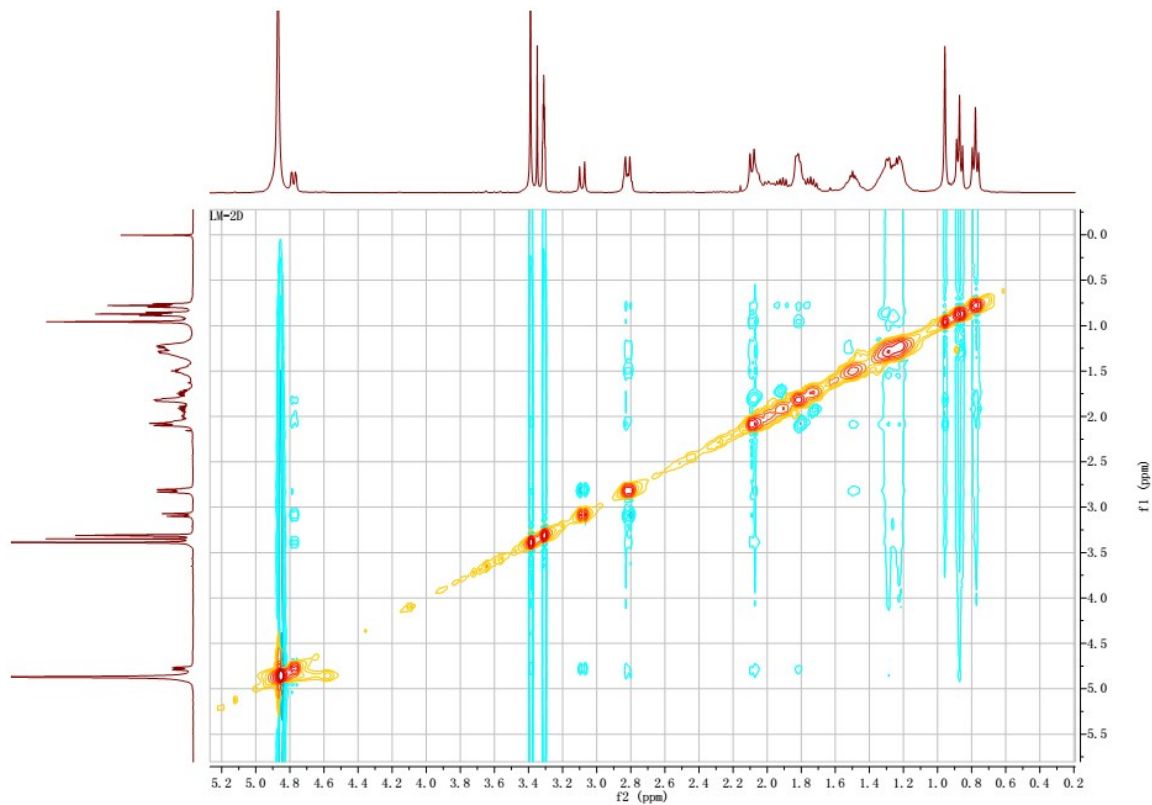



**Figure S39.** The HRMS-ESI spectrum for compound 5

2g #12 RT: 0.33 AV: 1 NL: 2.65E7  
T: FTMS + c ESI Full ms [300.00-1000.00]

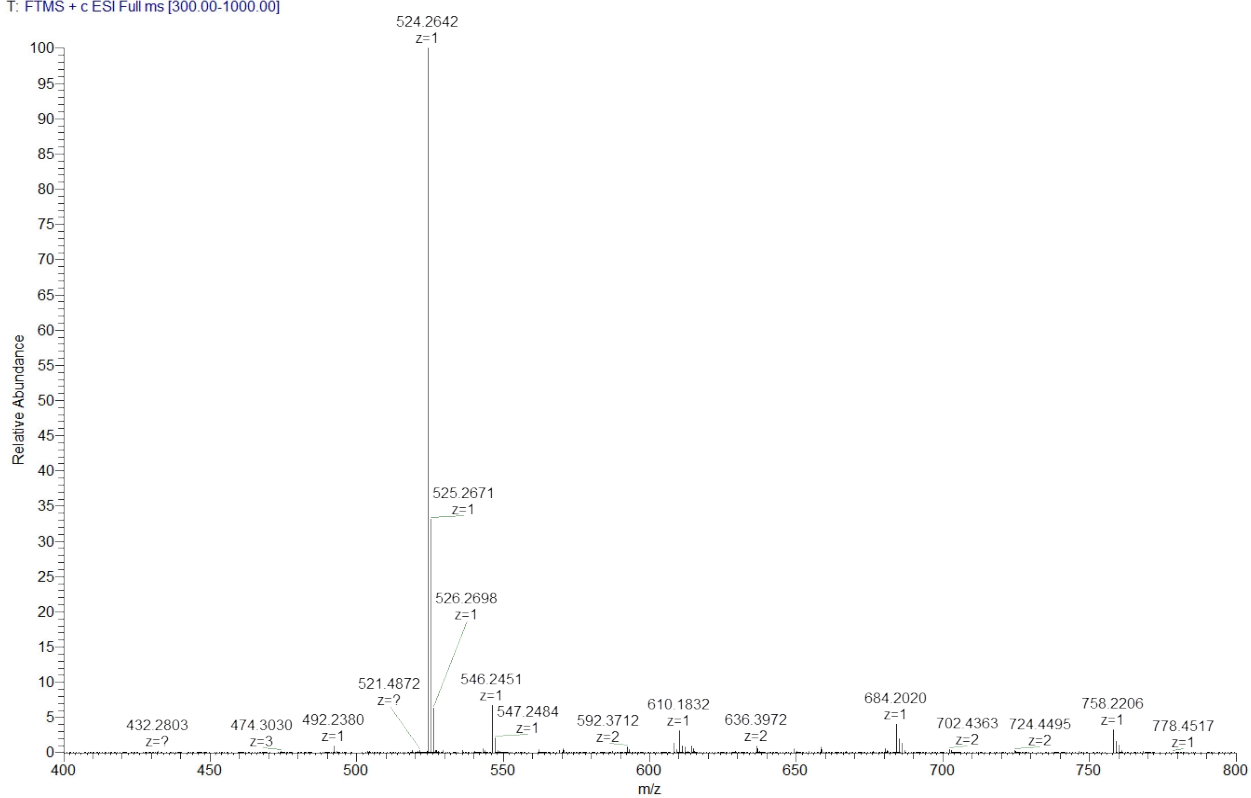

**Figure S40.**  $^1\text{H}$  NMR (600 MHz,  $\text{DMSO}-d_6$ ) spectrum for compound 6

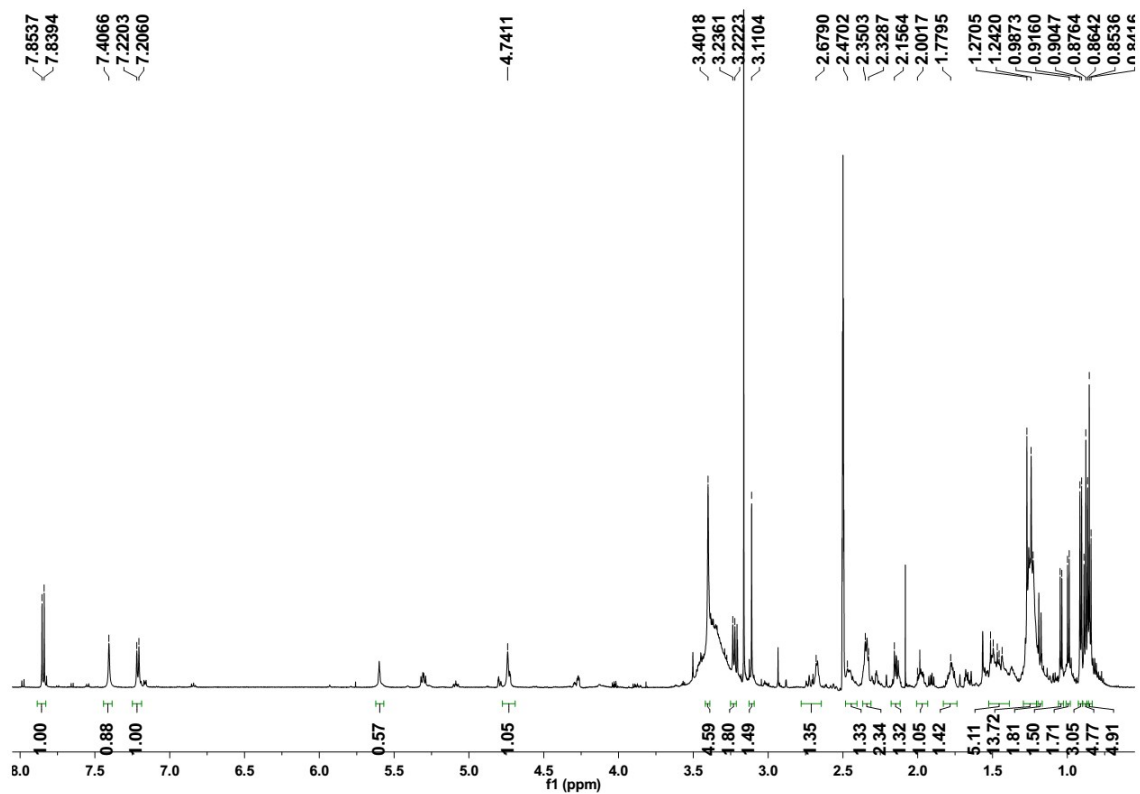

Figure S41.  $^{13}\text{C}$  NMR (151 MHz,  $\text{DMSO-}d_6$ ) spectrum for compound 6

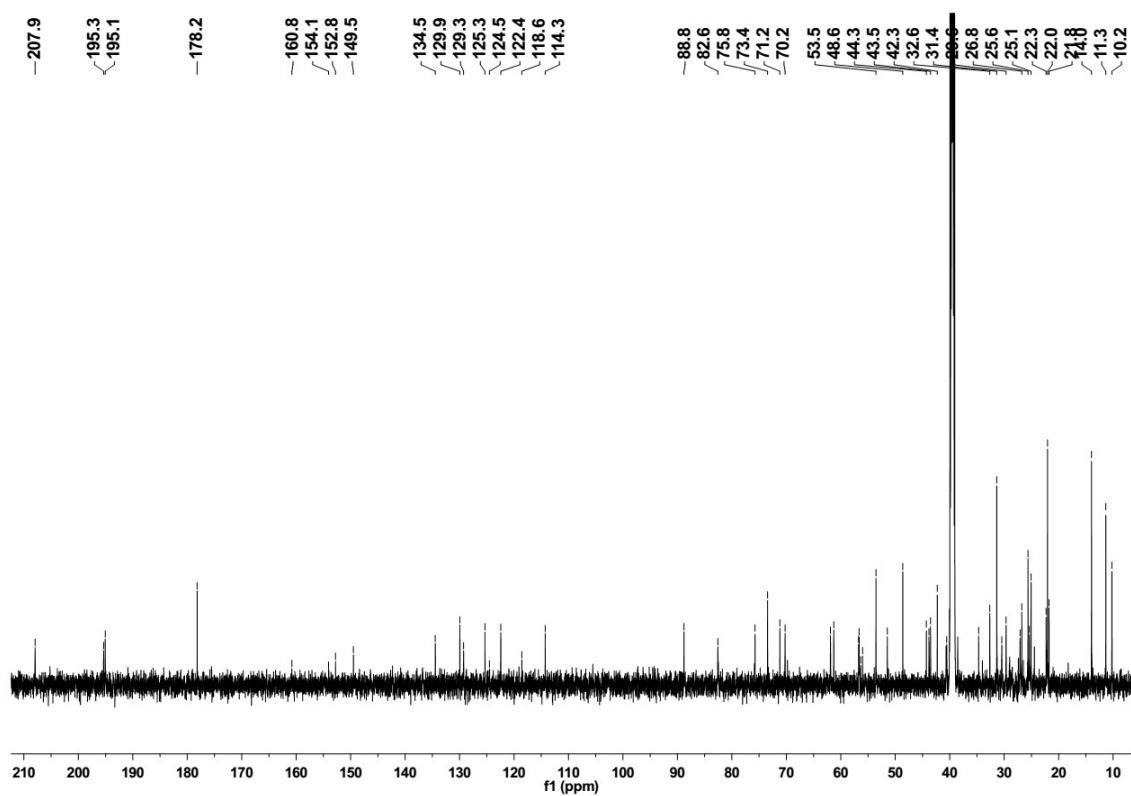

Figure S42. The HSQC spectrum for compound 6

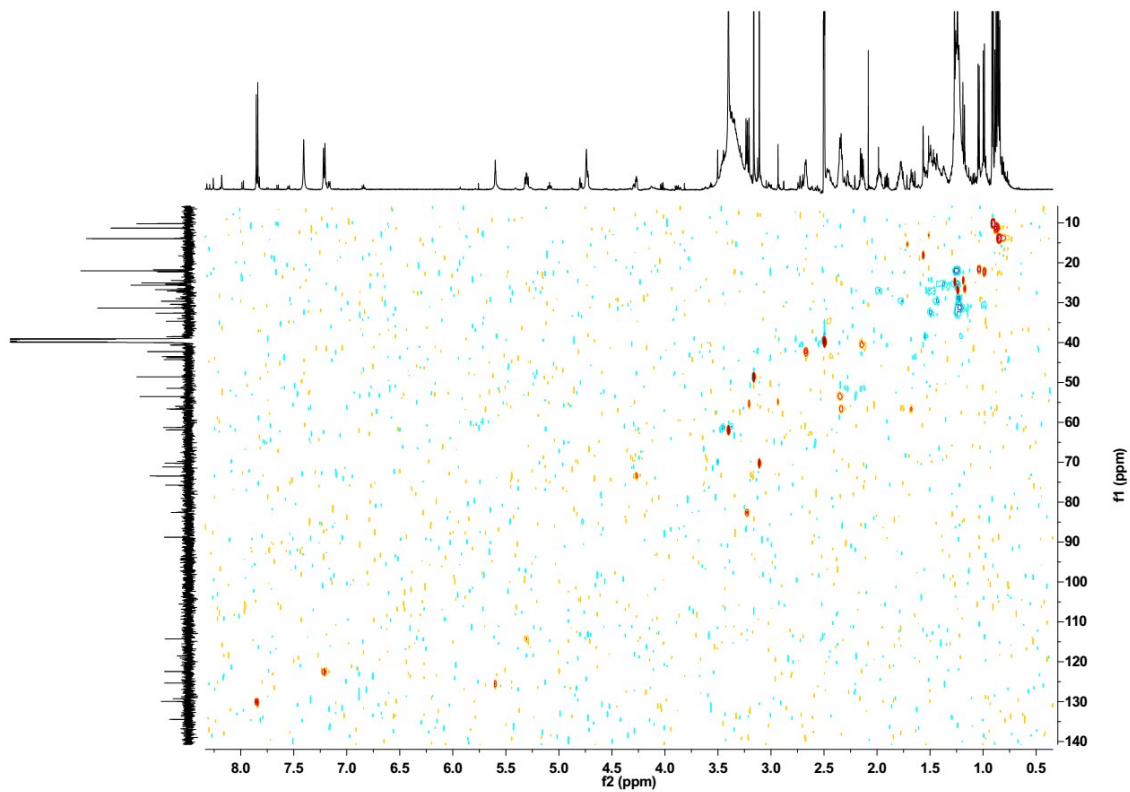

**Figure S43.** The HMBC spectrum for compound **6**

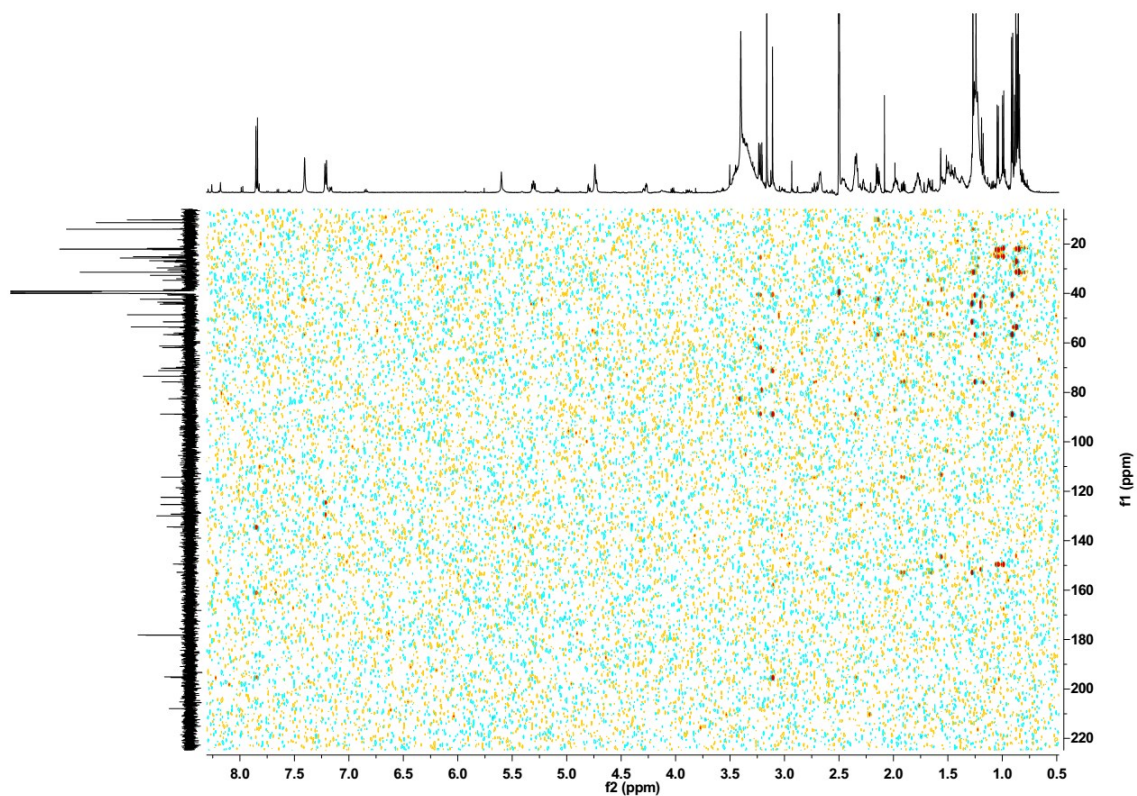

**Figure S44.**  $^1\text{H}/^1\text{H}$  COSY spectrum for compound **6**

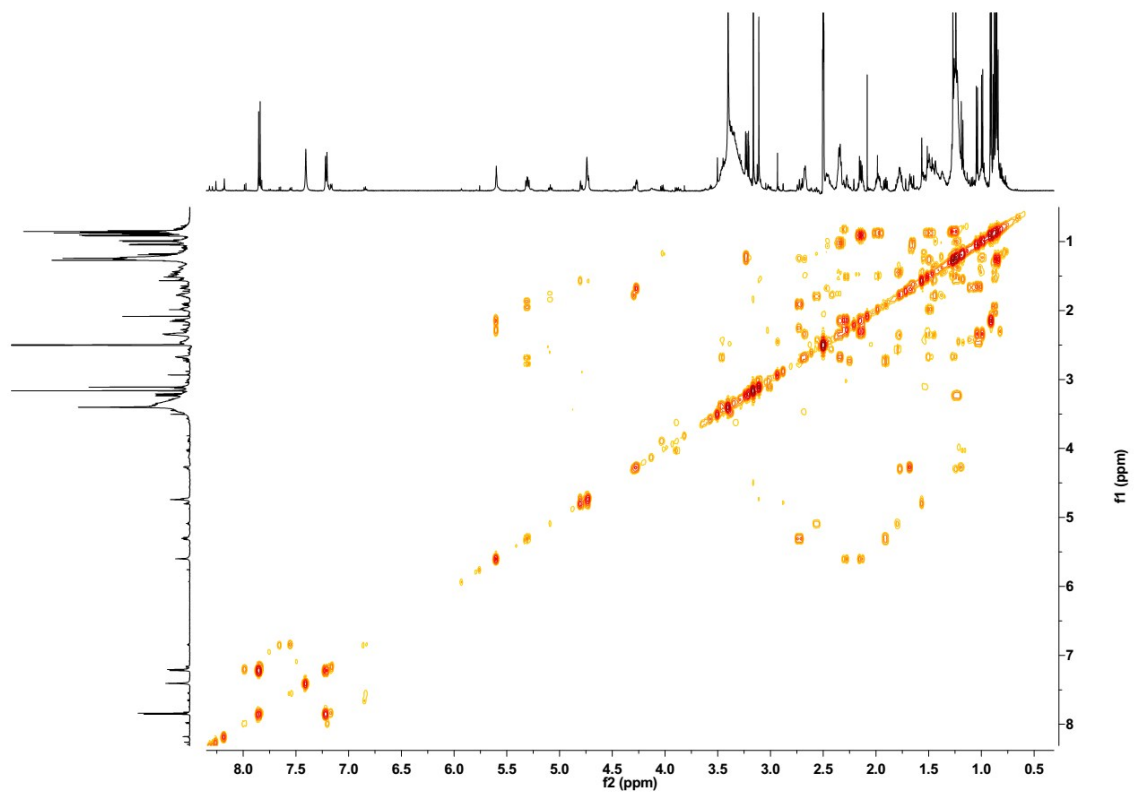

**Figure S45.** The HRMS-ESI spectrum for compound **6**

ya #10 RT: 0.29 AV: 1 NL: 4.17E6  
T: FTMS + c ESI Full ms [300.00-1000.00]

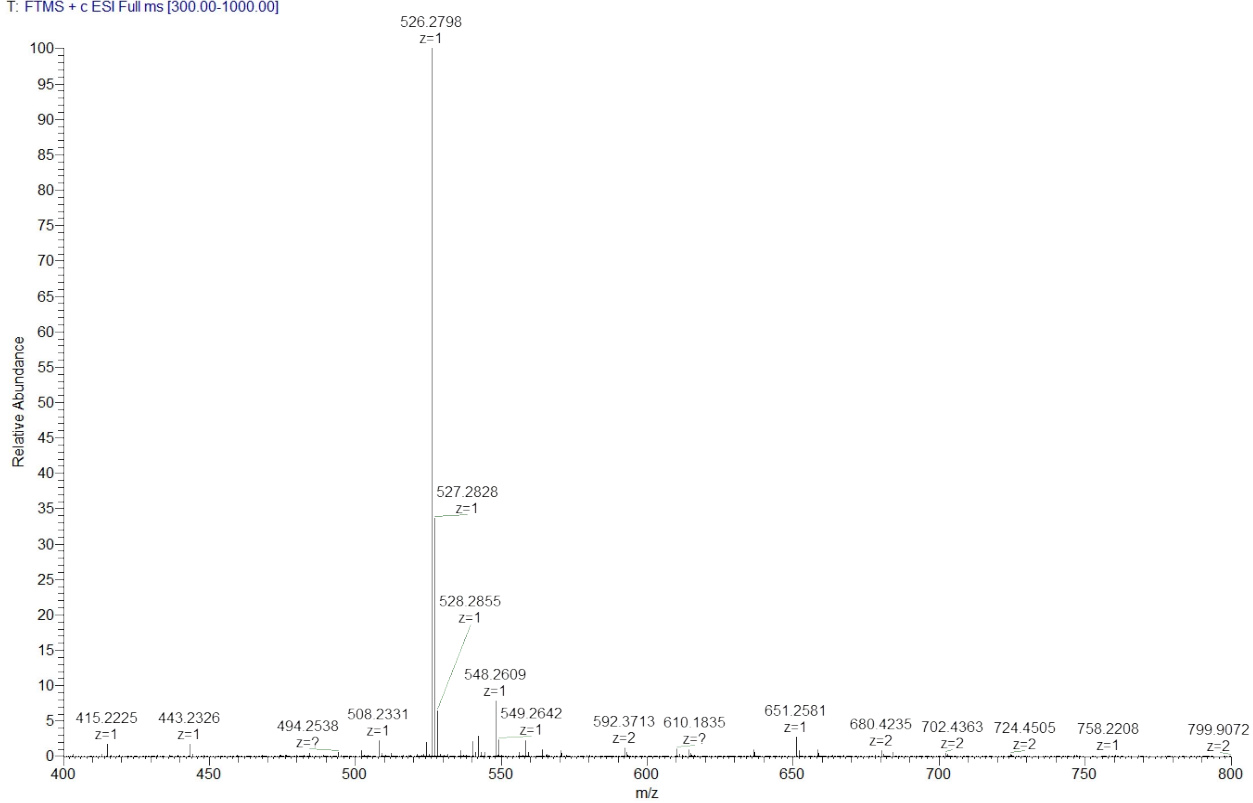

Supplement: c7ra06339c1.pdf [file c7ra06339c1.pdf]
